# 1 The Ebola virus VP40 matrix undergoes endosomal 2 disassembly essential for membrane fusion

3 Sophie L. Winter<sup>1,2</sup>, Gonen Golani<sup>2,3</sup>, Fabio Lolicato<sup>4,5</sup>, Melina Vallbracht<sup>1,2</sup>, Keerthihan  
4 Thiyagarajah<sup>1,2</sup>, Samy Sid Ahmed<sup>6</sup>, Christian Lüchtenborg<sup>4</sup>, Oliver T. Fackler<sup>6,7</sup>, Britta Brügger<sup>4</sup>,  
5 Thomas Hoenen<sup>8</sup>, Walter Nickel<sup>4</sup>, Ulrich S. Schwarz<sup>2,3</sup>, Petr Chlanda<sup>1,2\*</sup>

6 <sup>1</sup> Schaller Research Groups, Department of Infectious Diseases, Virology, University Hospital Heidelberg, Heidelberg,  
7 Germany

8 <sup>2</sup> BioQuant-Centre for Quantitative Biology, Heidelberg University, Heidelberg, Germany

9 <sup>3</sup> Institute for Theoretical Physics, Heidelberg University, Heidelberg, Germany

10 <sup>4</sup> Heidelberg University Biochemistry Center, Heidelberg, Germany

11 <sup>5</sup> Department of Physics, University of Helsinki, Helsinki, Finland

12 <sup>6</sup> Department of Infectious Diseases, Integrative Virology, University Hospital Heidelberg, Heidelberg, Germany

13 <sup>7</sup> German Centre for Infection Research (DZIF), Partner Site Heidelberg, Germany

14 <sup>8</sup> Institute of Molecular Virology and Cell Biology, Friedrich-Loeffler-Institut, Greifswald-Insel Riems, Germany

15 \*Correspondence: [chlanda@bioquant.uni-heidelberg.de](mailto:chlanda@bioquant.uni-heidelberg.de)

16

---

## 17 Abstract

18 Ebola viruses (EBOVs) are filamentous particles, whose shape and stability are determined by  
19 the VP40 matrix. Virus entry into host cells occurs via membrane fusion in late endosomes;  
20 however, the mechanism of how the remarkably long virions undergo uncoating including virion  
21 disassembly and nucleocapsid release into the cytosol, remains unknown. Here, we investigate  
22 the structural architecture of EBOVs entering host cells and discover that the VP40 matrix  
23 disassembles prior to membrane fusion. We reveal that VP40 disassembly is caused by the  
24 weakening of VP40-lipid interactions driven by low endosomal pH that equilibrates passively  
25 across the viral envelope without a dedicated ion channel. We further show that viral membrane  
26 fusion depends on VP40 matrix integrity, and its disassembly reduces the energy barrier for fusion  
27 stalk formation. Thus, pH-driven structural remodeling of the VP40 matrix acts as a molecular  
28 switch coupling viral matrix uncoating to membrane fusion during EBOV entry.

29

## 30 Introduction

31 Ebola viruses (EBOVs) are highly pathogenic negative-sense RNA viruses causing severe  
32 outbreaks of viral hemorrhagic fever in humans with high case fatality rates<sup>1</sup>. They enter host cells  
33 by macropinocytosis and undergo cytosolic entry in late endosomal compartments, where the  
34 fusion of the viral and endosomal membranes leads to genome release into the cytoplasm.  
35 EBOVs are characterized by their filamentous morphology which is determined by the viral matrix  
36 protein VP40 that drives budding of virions reaching up to several micrometers in length<sup>2,3</sup>. VP40  
37 interacts with negatively charged lipids<sup>4-6</sup> to assemble into a quasi-helical scaffold underneath the  
38 viral membrane<sup>7,8</sup> and is critical for the incorporation of the viral nucleocapsid into the virions by  
39 so far unknown VP40-nucleocapsid interactions. The EBOV nucleocapsid is composed of the

40 nucleoprotein (NP), viral protein (VP)24, and VP35<sup>3,9,10</sup> which together encapsidate the single-  
41 stranded RNA genome. Upon host cell entry, the nucleocapsid needs to dissociate from the virus  
42 particle and viral genome to enter the cytoplasm and enable genome replication and  
43 transcription<sup>11</sup>. These processes together are referred to as virus uncoating, which involves the  
44 weakening of protein-protein and protein-membrane interactions inside the virus lumen. The  
45 resulting changes in virion architecture allow the timely nucleocapsid release upon membrane  
46 fusion<sup>12</sup>. It is well established that fusion of the viral and endosomal membrane relies on  
47 interactions with the EBOV fusion protein GP, which is the only transmembrane protein that studs  
48 the viral envelope<sup>13-15</sup>. GP-mediated membrane fusion is triggered after proteolytic processing of  
49 GP by host cell cathepsin proteases<sup>16</sup> and depends on the interaction of the cleaved GP subunit  
50 GP1 with the late endosomal Niemann-Pick C1 (NPC1) receptor<sup>17-20</sup>. However, the molecular  
51 mechanism of how the remarkably long EBOVs undergo uncoating during cytosolic entry remains  
52 enigmatic. A growing body of evidence shows that matrix disassembly during viral entry can  
53 trigger a cascade of events required for viral uncoating and efficient virus entry<sup>21,22</sup>. While the  
54 structure of isolated Ebola virions is well characterized, it is currently unknown whether the VP40  
55 matrix undergoes conformational changes during virion entry and factors initiating EBOV  
56 disassembly remain to be elucidated. In addition, a mechanistic understanding of how interactions  
57 between the EBOV VP40 matrix, the viral membrane and nucleocapsid are modulated during viral  
58 entry is still missing. Since EBOVs belong to the late-penetrating viruses, which require low  
59 endosomal pH for cytosolic entry<sup>23</sup>, the acidic environment may serve as one of the triggers for  
60 virion uncoating.

61 Here, we investigate EBOV uncoating and the role of VP40 during virus entry into host cells by  
62 characterizing EBOVs in endosome-mimicking conditions *in vitro* and in endo-lysosomal  
63 compartments by *in situ* cryo-electron tomography (cryo-ET), which is complemented by  
64 membrane modelling approaches, lipidomics, and time-lapse fluorescence imaging. We find that  
65 the VP40 matrix and its interactions with lipids in the viral envelope are sensitive to low pH, which  
66 passively equilibrates across the viral envelope in acidic environments. This leads to the  
67 disassembly of the matrix layer allowing for fusion and genome release.

## 68 **Results**

### 69 *The Ebola virus VP40 matrix undergoes disassembly in endosomal compartments*

70 To shed light on EBOV endosomal uncoating at molecular resolution, we infected Huh7 cells  
71 cultured on electron microscopy grids with EBOVs (strain Mayinga) in BSL4 containment. Infected  
72 cells were chemically fixed after multiple rounds of infection had occurred at 22 or 48 h post-  
73 infection (Fig. 1 A, Fig. S1-3). After vitrification and cryo-focused ion beam (FIB) milling of the  
74 infected cells, we performed *in situ* cryo-ET of endosomal compartments containing EBOV  
75 particles (Fig. 1 B-G, Supplementary Video 1). Late endosomal compartments were identified by  
76 the presence of vesicles and membrane fragments (white arrow, Fig. 1 F), which are likely  
77 products of lysosomal degradation. In addition, we observed the accumulation of crystalline lipidic  
78 structures with a spacing of 3.2 nm (Fig. S1), consistent with the spacing found in cholesterol  
79 ester crystals previously described in lamellar bodies, lipid droplets, and isolated low-density  
80 lipoprotein particles<sup>24-26</sup>. Interestingly, Ebola virions in late endosomes retained their filamentous  
81 morphology and displayed well-defined nucleocapsids of approximately 20 nm in diameter (Fig. 1,

82 Fig. S 2). They appeared condensed and resembled nucleocapsid structures formed by truncated  
83 EBOV NP alone<sup>27</sup> but lacked the regular protrusions observed in nucleocapsids of isolated virions  
84 (Fig. S3). However, the VP40 matrix layer was detached from the envelope as apparent from the  
85 empty space adjacent to the EBOV membrane and disordered protein densities, which  
86 presumably represent disassembled VP40, were surrounding the nucleocapsid in the EBOV  
87 lumen (Fig. 1 D-G). Importantly, none of the five EBOV captured in endosomes displayed ordered  
88 VP40 matrices, and two virions had engulfed intraluminal vesicles (Fig. S2). In contrast, budding  
89 virions and extracellular virions adjacent to the plasma membrane of infected cells displayed  
90 assembled VP40 layers with VP40 proteins visible as distinct densities lining the membrane  
91 (Fig. 5 H-K, S4, n=8), similar to the VP40 layer in isolated virions (Fig. S3). Overall, this data  
92 indicates that EBOV uncoating involves VP40 disassembly in late endosomal compartments and  
93 suggests that endosomal VP40 disassembly occurs prior to GP-mediated membrane fusion.

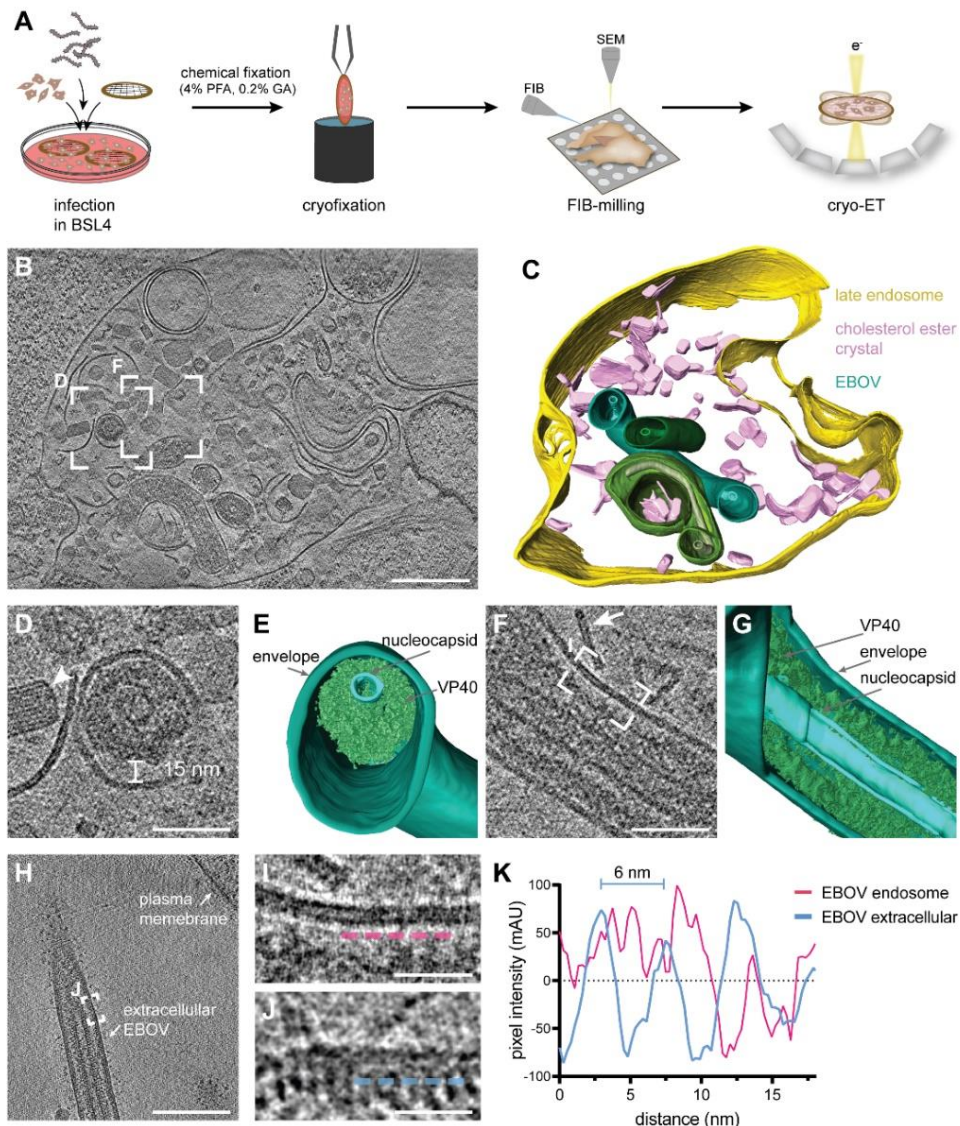

95 **Figure 1: *In situ* cryo-electron tomography of Ebola virions localized in endosomes of an infected cell.**  
96 **(A)** Schematic of the *in situ* cryo-ET workflow, including infection of cells grown on electron microscopy grids and  
97 chemical fixation for biosafety reasons before removal from BSL4. Cryofixation was performed prior to cell thinning by  
98 cryo-FIB milling and imaging by cryo-ET. **(B)** Slice through a tomogram showing EBOVs inside a late endosomal  
99 compartment. **(C)** 3D segmentation of the delimiting membrane (yellow), cholesterol ester crystals (pink), viral  
100 membranes (green) and nucleocapsids (light green) for visualization. **(D)** Magnified view of the area highlighted in (B)  
101 showing the transverse cross-section of a virion. A cholesterol ester crystal adjacent to the virion is marked by a white  
102 arrowhead. **(E)** 3D segmentation of the viral membrane, nucleocapsid and VP40 shown in (D). **(F)** Magnified view of a  
103 different slice of the tomogram in (B) showing a longitudinal cross-section through a virion. A linear membrane fragment  
104 adjacent to the virion is marked with a white arrow. **(G)** 3D segmentation of the viral membrane, nucleocapsid and  
105 VP40 displayed in (F). **(H)** Slices through a tomogram showing a purified Ebola virus before infection. **(I-J)** Magnified  
106 areas highlighted in (F) and (H), respectively, showing the viral membrane and VP40 densities at the luminal side. For  
107 comparison, line profiles at 3 nm distance from the inner membrane monolayer, visualized by dotted profiles (magenta  
108 and blue, respectively), were determined. **(K)** Line profiles adjacent to the inner viral membrane leaflet of a virion inside  
109 an endosome and a purified virion before infection. Scale bars: 200 nm (B, H), 50 nm (D, F), 20 nm (I, J).

### 110 *Low pH triggers disassembly of the Ebola virus matrix in vitro*

111 We next sought to identify factors driving VP40 disassembly. Since EBOVs enter host cells via  
112 late endosomes, which are characterized by low pH, we assessed the effect of external pH on  
113 the shape of Ebola virus-like particles (VLPs) and, in particular, on the structure of the VP40  
114 matrix. VLPs composed of VP40 and GP were produced from HEK 293T cells and analyzed by  
115 cryo-ET (Fig. 2 A-D). At neutral pH, the organization of VP40 proteins into a helical scaffold was  
116 apparent from transverse cross-sections as an additional profile adjacent to the inner membrane  
117 monolayer and as regular striations spanning the width of the particles when observed close to  
118 the VLP surface (Fig. 2 B, C). Individual VP40 proteins were visible as distinct densities lining the  
119 membrane (Fig. 2 D). To understand their organization within the matrix, we applied  
120 subtomogram averaging of the VP40 matrix in purified VLPs. In accord with recently published  
121 data<sup>28</sup>, the subtomogram average revealed the linear arrangement of VP40 dimers via their C-  
122 terminal domains (CTDs), which are directly connected to the inner membrane monolayer  
123 (Fig. 1 E). The available crystal structure of the VP40 dimer (pdb: 7jzj) fitted well into the average  
124 (Fig. 2 F) except for three short helical segments of one VP40 monomer (Fig. S5 A).  
125 To assess whether the VP40 matrix undergoes disassembly at low pH, VLPs were then subjected  
126 to the late endosomal pH of 4.5 for 30 min. Consistent with Ebola virions found in late endosomes,  
127 the VLPs retained their overall filamentous morphology but did not show ordered VP40 matrix  
128 layers. Instead, they contained disordered protein aggregates accumulated at the VLP core  
129 (Fig. 2 G-J). Additionally, a lack of densities between the membrane and protein aggregates  
130 indicates that VP40 detaches from the membrane, as particularly apparent from the cross-  
131 sections (Fig. 2 H, J), which was also reflected in a more variable particle diameter (Fig. S5 B).  
132 To elucidate whether this phenotype depends on the presence of EBOV GP, VLPs composed of  
133 VP40 alone were analysed by cryo-ET. The presence and absence of the ordered VP40 matrix  
134 at neutral and low pH, respectively, were clearly apparent as regular striations and disordered  
135 protein accumulations at the particles' cores (Fig. 2 K, Fig. S5 C). Accordingly, line density profiles  
136 proximal to the inner membrane monolayer of VLPs showed the 5-6 nm pitch of the assembled  
137 VP40 matrix at neutral pH, whereas no repeating densities were detected at low pH (Fig. 2 L).  
138 Hence, pH-mediated VP40 disassembly is independent of other viral proteins.

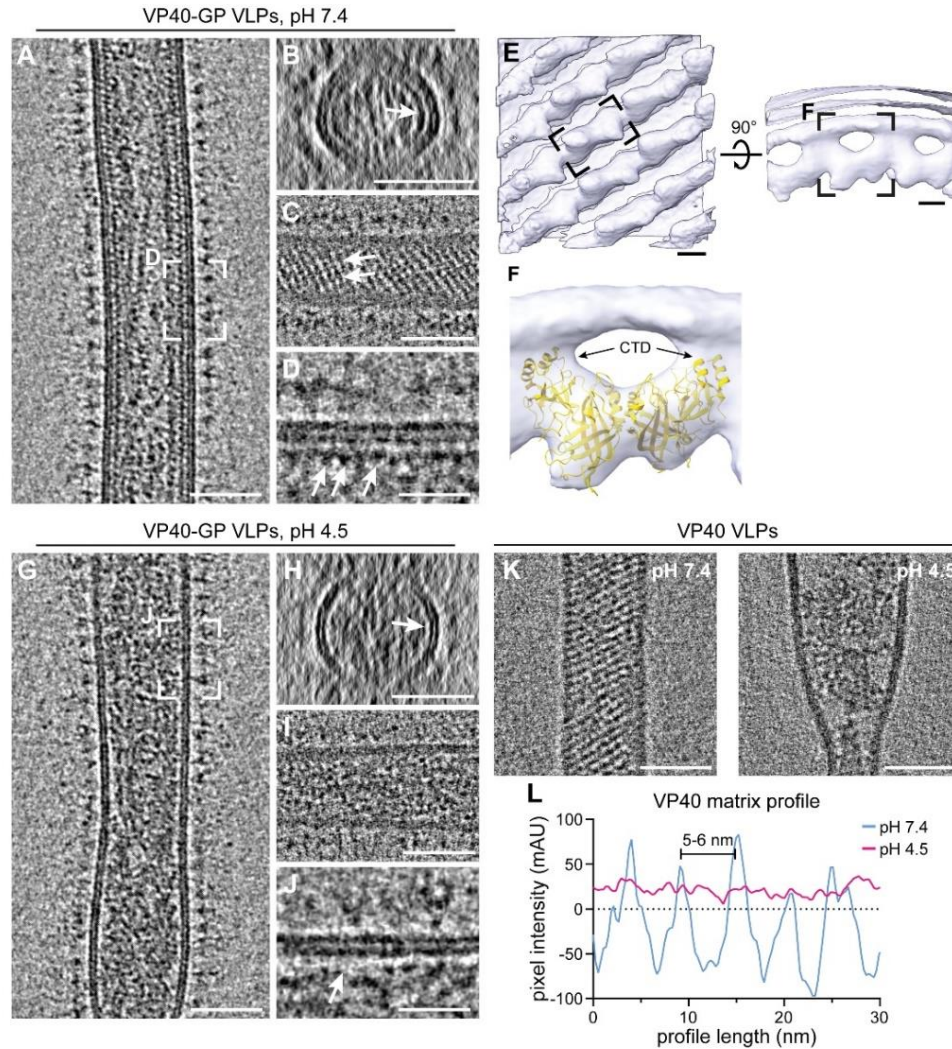

139  
 140 **Figure 2: The VP40 matrix in Ebola VLPs disassembles at low pH.** (A) Slices of a tomogram showing a filamentous  
 141 Ebola VLP composed of VP40 and GP at neutral pH, (n=37). (B-C) Transverse cross-section and longitudinal near-to-  
 142 surface slices of the tomogram shown in (A) displaying the densities for the outer and inner membrane monolayer and  
 143 an additional density of the VP40 matrix apparent as striations in (C) (white arrows). (D) Longitudinal cross-section  
 144 highlighting the VP40 densities adjacent to the membrane (white arrows). (E) Subtomogram average of the VP40 matrix  
 145 in Ebola VLPs composed of GP and VP40. A density representing a single VP40 dimer is indicated by a black dashed  
 146 rectangle. (F) Crystal structure of the VP40 dimer (pdb: 7jzi) fitted into the subtomogram average with the C-terminal  
 147 domains (CTDs) indicated by arrows. (G-J) Slices of a tomogram showing a filamentous Ebola VLP composed of VP40  
 148 and GP after incubation at low pH (n=18). White arrows in (H) and (J) highlight areas adjacent to the VLP membrane  
 149 devoid of protein densities in contrast to corresponding slices of VLPs at neutral pH. (K) Slices of tomograms showing  
 150 filamentous VLPs composed of VP40 after incubation at neutral (n=22) and low pH (n=8), respectively. (L) Line density  
 151 profiles determined adjacent to the inner membrane monolayer of VLPs incubated at neutral (blue) and low pH  
 152 (magenta). At neutral pH, the VP40 matrix detectable as regular densities in (D) have a 5-6 nm pitch. Scale bars: (A-  
 153 C), (G-I) and (K): 50 nm, (E): 2.5 nm, (D), (J): 20 nm.

154 *VP40 interactions with negatively charged lipids are weakened at low pH*

155 To further probe the specific VP40-lipid interactions at neutral and low pH, we performed all-atom  
 156 molecular dynamics (MD) simulations and modelled the binding of VP40 dimers to membrane  
 157 lipids at different pH levels. To this end, we emulated a simplified membrane containing 30%  
 158 phosphatidylcholine, 40% cholesterol and 30% phosphatidylserine mimicking the overall negative

159 charge of the VLP inner membrane monolayer. We modelled missing C-terminal residues, which  
160 are inherently flexible and disordered, into the VP40 dimer structure (pdb: 7jzj) and simulated  
161 VP40-membrane interactions for a cumulative time of 10 microseconds for each pH using the  
162 CHARMM36m force field<sup>29–31</sup>. We show that after one CTD of the VP40 dimer established  
163 interactions with phosphatidylserines, the second CTD is pulled towards the membrane, leading  
164 to the anchoring of the dimer into the membrane (Fig. 3 A). The membrane interactions were  
165 driven by positively charged residues decorating the C-termini of the VP40 dimer, including K224,  
166 K225, K274, and K275, which corroborates experimental data showing that these residues form  
167 a basic patch required for membrane association and budding of VLPs<sup>32</sup>. In the MD simulations,  
168 the basic patches strongly promote lipid interactions and localize in flexible loops at the CTDs,  
169 which penetrate into the inner membrane monolayer (Fig. 3 B, C) and correspond to the previously  
170 unassigned densities<sup>8</sup> between the VP40 matrix and viral membrane in the subtomogram average  
171 (Fig. 2 E, F). Moreover, the MD simulations showed that the rotation angle of VP40 monomers  
172 oscillates around 1° (SD 9.5) along the N-terminal -dimerization domain and is in agreement with  
173 the subtomogram average (Fig. 3 B, Fig. S6 C-E), such that only flexible loops protrude from the  
174 average (Fig. 3 D). Accordingly, when aligning the crystal structure of the VP40 dimer (pdb: 7jzj)  
175 with the VP40 structure obtained from the MD simulations, the membrane-proximal loops and  
176 short alpha-helices were mismatched while the core of the monomer aligned well (Fig. 3 B,  
177 highlighted in yellow, Fig. S6 A, B). The second monomer displayed similar secondary structures,  
178 which were tilted with respect to the crystal structure by 17°, causing a mismatch when compared  
179 to the crystal structure (Fig. 3 B, blue monomer, Fig. S6 E).

180 Next, we simulated VP40–membrane interactions at pH 4.5 and observed a significantly  
181 decreased affinity towards the membrane, consistent with our tomography data (Fig. 3 E). The  
182 free energy profile determined from the MD simulations (Fig. 3 E) revealed an energy minimum  
183 that was 4.1 k<sub>B</sub>T weaker at low pH compared to pH 7.4. However, binding was not completely  
184 diminished since 10% of the phosphatidylserines used in the simulation are still charged<sup>33</sup>, and  
185 the membrane modelled here containing high levels of phosphatidylserine can still engage in  
186 electrostatic interactions. To identify which lipids are enriched in the VLP membrane and are thus  
187 likely involved in VP40 binding, we then determined the VLP lipid composition by mass  
188 spectrometry (Fig. 3 F, Fig. S6, Supplementary table T1). As expected for Ebola VLPs budding  
189 from microdomains in the plasma membrane<sup>34,35</sup>, the Ebola VLP envelope was rich in  
190 phosphatidylserine and cholesterol, phosphatidylcholine and sphingomyelin (9%, 39%, 25% and  
191 9%, respectively). Collectively, this data argues for low pH-mediated VP40 disassembly through  
192 neutralization of negatively charged phospholipids in the viral envelope and highlights  
193 electrostatic interactions as the main driving forces of the VP40-membrane binding (Fig. S6 F).

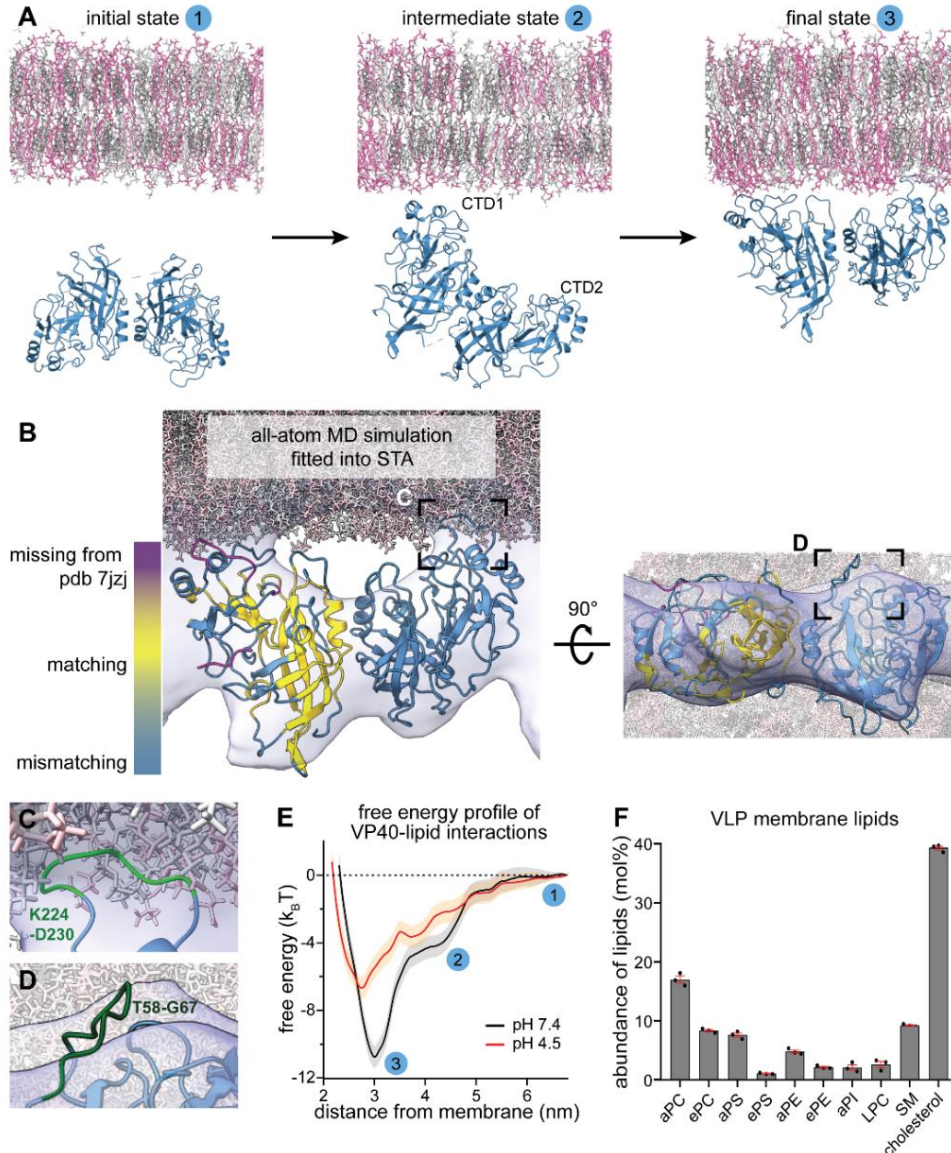

194  
 195 **Figure 3: VP40–lipid interactions at neutral and low pH.** (A) Initial, intermediate, and final state of the VP40-  
 196 membrane interaction pathway sampled with unbiased all-atom molecular dynamics (MD) simulations. The simulated  
 197 membrane is composed of 30% phosphatidylcholine, 40% cholesterol, and 30% phosphatidylserine. VP40 is randomly  
 198 oriented towards the membrane in the initial state. Lipid interactions are first mediated via one C-terminal domain  
 199 (CTD1) (intermediate state) before the second CTD (CTD2) is ultimately pulled towards to membrane. (B) MD  
 200 simulation frame of the VP40-membrane-bound state, with a rotation angle of VP40 monomers along the N-terminal-  
 201 dimerization domain (Fig. S2, C-D) of 1°, fitted into the subtomogram average shown in (Fig. 2 E). Missing C-terminal  
 202 residues in the crystal structure of the VP40 dimer (pdb: 7jzj) were computationally modelled (magenta). VP40  
 203 conformational changes upon lipid-interaction resulted in a displacement of secondary structures (steel blue), while the  
 204 core of the protein remained unaltered in comparison to the crystal structure (yellow). (C) The area highlighted in (B)  
 205 shows a flexible, C-terminal loop (green) containing the residues K224 and K225 that interact with phosphatidylserines  
 206 in the inner membrane monolayer. (D) Area highlighted in the rotated MD simulation in (B) showing a flexible loop  
 207 (residues T58-G67) protruding from the subtomogram average. (E) Free energy profiles of VP40-lipid interactions at  
 208 pH 7.4 and pH 4.5 determined from MD simulations. The plot shows free energy (in  $k_B T$ ) at increasing membrane-VP40  
 209 distances (nm) with indicated three states shown in (A). (F) Ebola VLP lipid composition showing highly abundant lipids  
 210 determined by mass spectrometry in mol%, n=3. Lipid abbreviations: phosphatidylcholine (PC), phosphatidylserine  
 211 (PS), phosphatidylethanolamine (PE), phosphatidylinositol (PI), lyso-phosphatidylcholine (LPC), sphingomyelin (SM).  
 212 Prefix “a” indicates acyl-linked glycerophospholipids, prefix “e” indicates ether-linked (plasmalyn) or the presence of  
 213 one odd and one even chain fatty acyl.

214 *Protons passively equilibrate across the EBOV membrane*

215 We next assessed the acidification kinetics to elucidate the mechanism of ion permeability across  
216 the viral membrane. Ebola VLPs composed of GP, VP40, and the pH-sensitive GFP variant  
217 pHluorin<sup>36</sup> N-terminally fused to VP40 (pHluorin-VP40) were prepared to monitor pH changes in  
218 VLP lumina upon altering the pH of the surrounding buffer (Fig. 4 A). Pleomorphic VLPs containing  
219 VP40 in excess over VP40-pHluorin, including filamentous and spherical particles, were imaged  
220 by time-lapse microscopy (Fig. 4 B, C). At neutral pH, the VLPs showed a fluorescent signal,  
221 which gradually decayed over several minutes after lowering the external pH (Fig. 4 D). In  
222 contrast, when adding the detergent Triton X-100 (T-X<sup>100</sup>) before imaging to permeabilize the VLP  
223 membrane, the signal decayed to background fluorescence within the first 15 seconds (Fig. 4 D),  
224 indicating that protonation of pHluorin was slowed down by the membrane of the VLPs. To  
225 calculate the acidification kinetics of the VLPs' lumen, we determined pH levels in the VLPs (Fig. 4  
226 E) by correlating the pHluorin fluorescence intensity to pH using a calibration curve (Fig. S7 A).  
227 We found that the luminal pH of filamentous VLPs decreased from 7.4 to 6.4 after 6 minutes,  
228 while for the spherical particles, this decay had already occurred after 3.5 minutes (Fig. 4 E). We  
229 next calculated the membrane proton permeability coefficient,  $P_m$ , based on the geometry of the  
230 VLPs measured by cryo-ET (Fig. 2) and the fluorescence decay times (Fig. S7 B). Filamentous  
231 VLPs had a permeability coefficient of  $1.2 \pm 0.2 \text{ \AA} \cdot \text{sec}^{-1}$ , whereas the membrane of spherical VLPs  
232 was significantly more permeable with a permeability coefficient of  $33 \pm 9 \text{ \AA} \cdot \text{sec}^{-1}$ .  
233 To compare the membrane permeability of the VLPs with the permeability of membranes  
234 containing a well-characterized viral ion channel, we used HEK 293T cells expressing VP40-  
235 pHluorin and the influenza ion channel M2. In line with previous measurements<sup>37,38</sup>, the plasma  
236 membrane in cells displayed a permeability coefficient of  $345 \pm 71 \text{ \AA} \cdot \text{sec}^{-1}$  (n=44) in the absence  
237 of M2. As expected, the permeability increased with increasing amounts of M2 present in the  
238 plasma membrane up to  $1940 \pm 562 \text{ \AA} \cdot \text{sec}^{-1}$  (n=26) when M2 and VP40 were transfected at a 1:0.2  
239 molar ratio (Fig. 4 E, F). Compared to the envelope of filamentous Ebola VLPs, the plasma  
240 membrane was more permeable to protons already in the absence of M2.



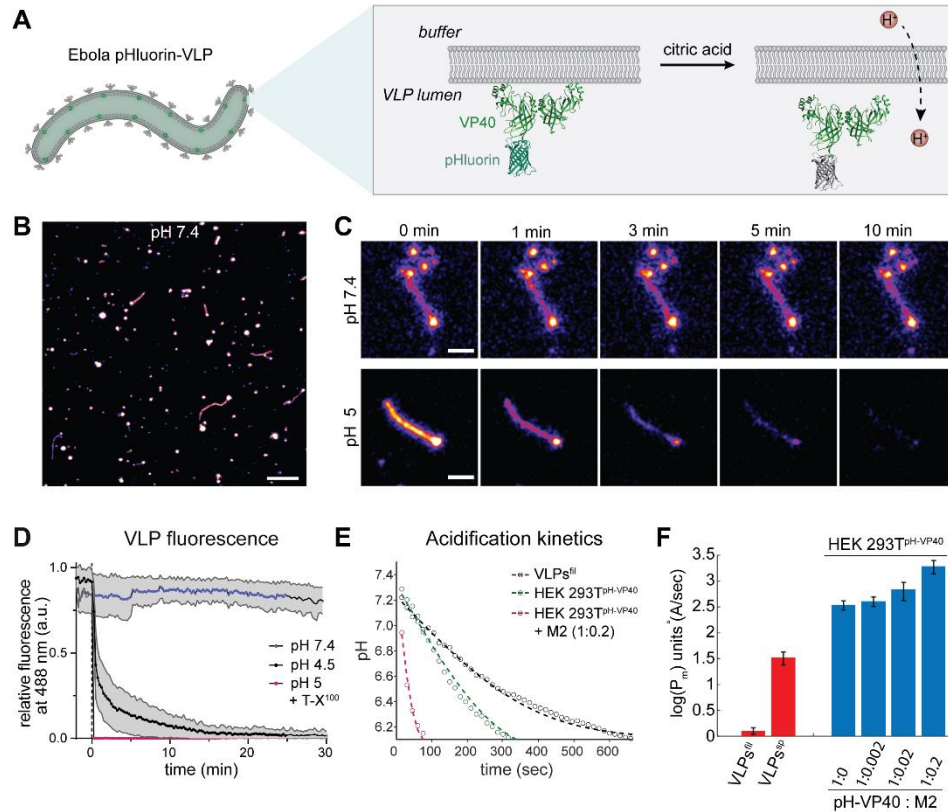

241  
 242 **Figure 4: Time-lapse microscopy of Ebola VLPs at different pH.** (A) Schematic showing the VLP membrane and  
 243 pHluorin-VP40 facing the luminal side of the VLPs. Upon protonation, pHluorin loses its fluorescence properties and  
 244 serves as a proxy for proton diffusion across the membrane. (B) Overview confocal fluorescence microscopy image  
 245 showing pleomorphic pHluorin-labelled VLPs composed of VP40, pHluorin-VP40 (ratio 10:1) and GP. (C) Magnified  
 246 images of representative VLPs acquired during time-lapse microscopy at neutral pH and after acidification to  
 247 approximately pH 5. Frames are exemplarily shown at 0, 1, 3, 5 and 10 min after lowering the external pH. (D) Plot  
 248 showing the mean relative fluorescence intensities and standard deviation of VLPs imaged at neutral pH, low pH and  
 249 in the presence of Triton X-100 (T-X<sup>100</sup>) at low pH over time. (E) Plot showing the drop of pH inside VLPs over time  
 250 after lowering the pH of the surrounding buffer to 5. The dots represent the mean values, and the dashed lines are the  
 251 theoretical fit to Eq. 3. (F) Membrane permeability of VLPs (red) and HEK 293T cells expressing different ratios of VP40  
 252 and M2 (blue). The permeability is displayed on a logarithmic scale. Permeability coefficients: filamentous VLPs  
 253  $1.2 \pm 0.2 \text{ \AA} \cdot \text{sec}^{-1}$ , spherical VLPs  $33 \pm 9 \text{ \AA} \cdot \text{sec}^{-1}$ , cells expressing no M2  $345 \pm 71 \text{ \AA} \cdot \text{sec}^{-1}$ , cells expressing pHluorin-  
 254 VP40 and M2 at 1:0.002 molar ratio  $409 \pm 85 \text{ \AA} \cdot \text{sec}^{-1}$ , cells expressing pHluorin-VP40 and M2 at 1:0.02 molar ratio  
 255  $683 \pm 263 \text{ \AA} \cdot \text{sec}^{-1}$  and cells expressing pHluorin-VP40 and M2 at 1:0.2 molar ratio  $1940 \pm 562 \text{ \AA} \cdot \text{sec}^{-1}$ .

256 *Disassembly of the VP40 matrix is critical for membrane fusion*

257 Collectively, our experimental data and MD simulations indicate that low pH drives VP40 matrix  
 258 disassembly and detachment from the viral envelope. We speculated that this influences the GP-  
 259 mediated membrane fusion between the EBOV envelope and the endosomal membrane. To test  
 260 this hypothesis, we numerically simulated the membrane fusion pathway in the presence of the  
 261 VP40 matrix and estimated the magnitude of the two major energy barriers to membrane fusion:  
 262 stalk and fusion pore formation<sup>39-42</sup>. We applied a continuum approach to model the lipid  
 263 membrane with the commonly used framework of the theory of splay-tilt deformations<sup>43,44</sup> and the  
 264 VP40 matrix layer as a uniform thin shell that interacts continuously with the virus envelope but  
 265 can also locally detach from the membrane near the stalk and diaphragm rim (Fig. 5 A). Based  
 266 on the VP40-membrane binding energy obtained from the MD simulations at pH 7.4 (Fig. 3 G)

267 and the density of VP40 dimers on the viral envelope determined from the subtomogram average  
268 (Fig. 2 E), we estimated the VP40 matrix interaction energy density to be  $0.38 \pm 0.02 \text{ k}_B\text{T}/\text{nm}^2$   
269 (with a dimer density of  $0.036 \text{ nm}^{-2}$  and free binding energy of  $10.77 \pm 0.47 \text{ k}_B\text{T}$ ). Consistently with  
270 our cryo-ET data, we assume that the interaction energy density vanishes at low pH due to the  
271 VP40 matrix disassembly. Importantly, our calculations showed that the initiation of viral  
272 membrane fusion is more favorable after VP40 disassembly. The calculated stalk formation  
273 energy barrier drops from 89-79  $\text{k}_B\text{T}$  to 65  $\text{k}_B\text{T}$  due to the weakening of the VP40-lipid interactions  
274 at low pH, depending on the matrix layer rigidity (Fig. 5 B). Hence, the intact VP40 matrix can  
275 prevent or slow down the stalk formation, which is the first step of membrane fusion.  
276 Interestingly, our model predicts that fusion pore formation, which occurs after stalk formation, is  
277 facilitated in the presence of the assembled VP40 matrix because of increased stress in the  
278 hemifusion diaphragm. Simulation data showed that the interaction energy density and the rigidity  
279 of the VP40 matrix modulate the shape of the hemifusion diaphragm structure (Fig. 5 C), which  
280 determines the energy barrier of pore formation. Strong interactions between the lipids and VP40  
281 matrix (Fig. 5 C, 'tight-bound' configuration) stabilize the hemifusion diaphragm, thereby inhibiting  
282 fusion pore formation. Conversely, in case of a weakly interacting or stiff VP40 matrix (Fig. 5 C,  
283 'loose' configuration), the hemifusion diaphragm is more unstable, which results in a lower energy  
284 barrier for fusion pore formation (Fig. 5 D). Our model showed that the minimal pore opening  
285 energy is at the phase boundary between 'loose' and 'tight-bound' configurations, where  
286 diaphragm stress is maximal (Fig. 5 D). Given the VP40-membrane binding energy and VP40  
287 dimer envelope density found in the MD simulations (Fig. 3 E), we could show that the VP40  
288 matrix and the membrane preferably adopt the 'loose' configuration at both neutral and acidic pH.  
289 Therefore, contrary to the stalk formation energy barrier, which is decreased upon VP40 matrix  
290 disassembly, the pore formation energy barrier is lower in the presence of the VP40 matrix layer  
291 by 16-33  $\text{k}_B\text{T}$  (Fig. 5 D), depending on the matrix layer rigidity (Fig. S4 A).

292 To validate this theoretical model experimentally, we performed beta-lactamase entry assays  
293 using VLPs<sup>45</sup>. EBOV membrane fusion requires proteolytic cleavage of GP by low pH-activated  
294 cathepsin proteases<sup>16</sup> and subsequent binding of the cleaved GP1 subunit to the endosomal  
295 receptor NPC1. To circumvent the need for low pH to activate cathepsin proteases, we substituted  
296 cathepsins with thermolysins which are active at neutral pH<sup>46</sup>, thereby decoupling the low pH  
297 requirement from proteolytic GP processing. Ebola VLPs composed of GP, VP40, and beta-  
298 lactamase N-terminally fused to VP40 (BlaM-VP40) were purified and subjected to thermolysin  
299 treatment followed by incubation at neutral or low pH. We then incubated target Huh7 cells with  
300 the pre-treated VLPs, loaded the cells with a fluorescent BlaM substrate, and assessed virus entry  
301 by FACS (Fig. S8). Thermolysin treatment significantly enhanced host cell entry, whereas the  
302 enhancement of entry by low pH treatment alone was less pronounced and not statistically  
303 significant (Fig. 5 F). To determine whether thermolysin-treated VLPs still require low pH for entry,  
304 we challenged host cells treated with ammonium chloride, which blocks endosomal acidification.  
305 Strikingly, entry of VLPs treated with thermolysin was completely inhibited by ammonium chloride,  
306 which is in line with a previous study conducted with bafilomycin to inhibit endosomal  
307 acidification<sup>47</sup>. This suggests that GP processing alone is insufficient to enable entry. Conversely,  
308 low pH treated VLPs were also unable to enter target cells treated with ammonium chloride since  
309 impaired endosomal acidification prevents the activation of cathepsin proteases and hence GP

310 priming. Combined thermolysin- and low pH-treatment of VLPs *in vitro* rescued entry into host  
 311 cells with inhibited endosomal acidification, albeit to a lesser extent compared to entry into  
 312 untreated cells. Overall, these data show that VP40 matrix integrity modulates GP-mediated  
 313 membrane fusion, strongly supporting the notion that VP40 disassembly is required for and  
 314 precedes membrane fusion.

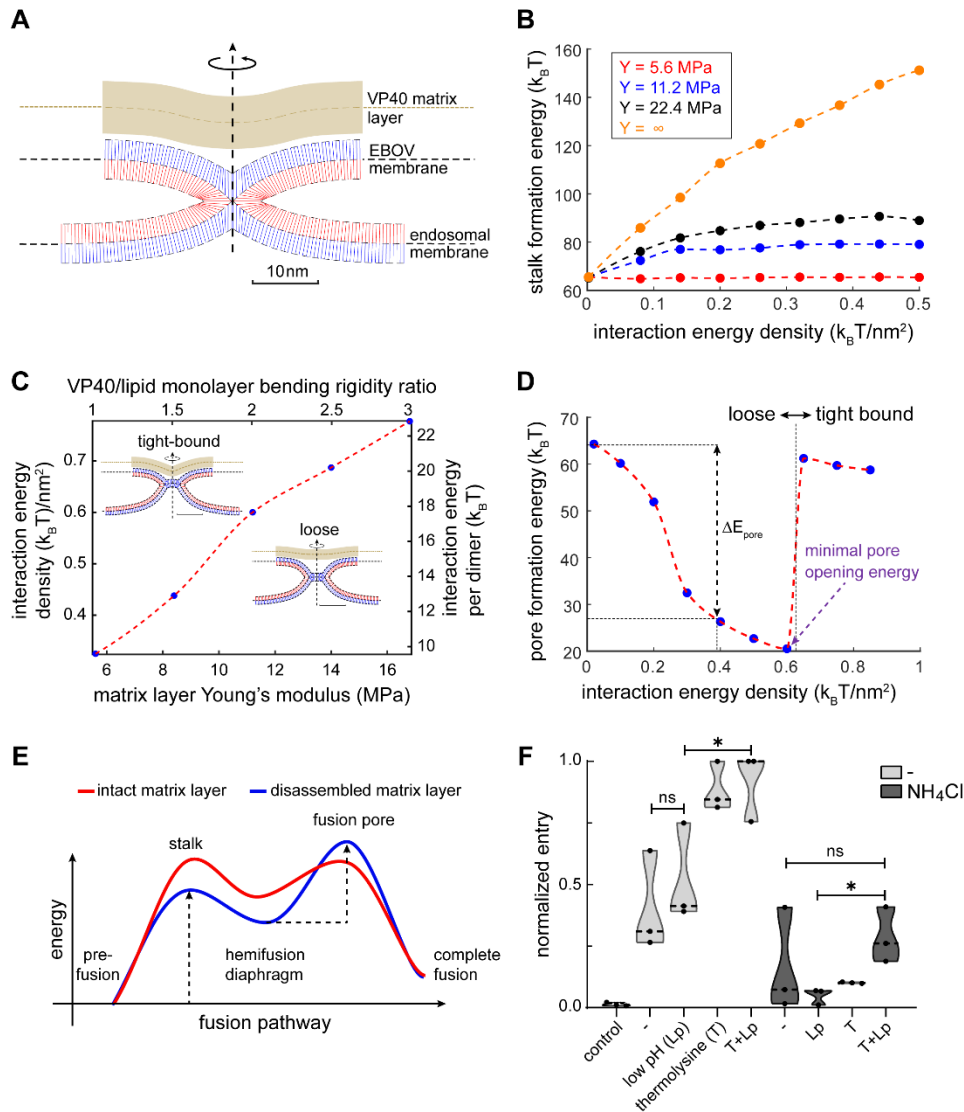

315  
 316 **Figure 5: Membrane fusion dynamics in the presence and absence of the VP40 layer. (A)** Simulation result of a  
 317 hemifusion stalk in the presence of a rigid matrix layer (VP40). The blue and red lines represent the averaged lipid  
 318 director of the distal and proximal monolayers, respectively. The VP40 matrix layer is represented by the continuous  
 319 thick brown strip. Parameters used in panels (A-D) for the lipid membrane: lipid monolayer bending rigidity  $10 k_B T$ , tilt  
 320 decay length  $1.5$  nm, saddle splay modulus to bending modulus ratio  $-5 k_B T$ , monolayer spontaneous curvature  $-$   
 321  $0.22 nm^{-1}$ , and monolayer width  $1.5$  nm. VP40 matrix layer: width  $4$  nm, Poisson's ratio  $0.5$ , and membrane mid-plane  
 322 to VP40 mid-plane optimal distance  $4$  nm. In panel (A) the matrix layer Young's modulus is  $11.2$  MPa, and the interaction  
 323 energy density is  $0.2 k_B T/nm^2$ . **(B)** Stalk formation energy as a function of VP40-membrane interaction energy. The  
 324 stalk energy for non-interacting VP40 matrix ( $u_0 = 0$ ) is  $65 k_B T$ . VP40 matrix layer Young's modulus legend – red  $5.6$   
 325 MPa, blue  $11.2$  MPa, black  $16.8$  MPa, and orange is infinitely rigid. The bending rigidity ratio between the VP40 matrix  
 326 layer and lipid monolayer are  $1, 2, 3$ , and infinity, respectively. The line represents an infinitely rigid layer. **(C)** Hemifusion  
 327 diaphragm configurations phase-diagram – above dotted red line: tight-bound solution and loose configuration below.  
 328 The inserts are simulation results with layer Young's modulus of  $11.2$  MPa. The interaction energy density is  $0.2$

329  $k_B T/nm^2$  in loose configuration and  $0.85 k_B T/nm^2$  in the tight-bound configuration. The scale bar is 10 nm. **(D)** Fusion  
330 pore formation energy as a function of VP40-membrane interaction energy. The discontinuity in the energy is located  
331 at the phase line between configurations (see C). The change in pore formation energy,  $\Delta E_{pore}$  is defined as the  
332 difference between fusion-pore formation energy at interaction energy density  $0.2 k_B T/nm^2$  (the value found using MD  
333 simulations) to the matrix-free case (no interaction energy). A-D) Dotted lines serve as a guide to the eye. **(E)** Illustration  
334 of the effect of the matrix layer on the fusion pathway and the fusion intermediates in the absence of the matrix layer.  
335 As a result of the presence of the matrix layer, the stalk formation energy barrier increases while the pore formation  
336 energy barrier decreases and the hemifusion diaphragm intermediate is less stable. **(F)** Quantification of FACS data  
337 showing Ebola VLP entry as measured by a fluorescence shift of infected cells from emission at 510 nm (no entry) to  
338 450 nm (entry). VLPs were treated prior to infection as indicated on the x-axis, with control: uninfected control cells, –  
339 : no treatment, T: thermolysin-treatment at neutral pH, Lp: low pH treatment. Target cells were treated with media or  
340 ammonium chloride ( $NH_4Cl$ ),  $n = 3$  with 10'000 cells measured per sample.

## 341 Discussion

342 EBOVs are remarkably long, filamentous virions that enter the cytoplasm by fusion with late  
343 endosomal membranes. Similar to other enveloped viruses, the shape and stability of EBOVs are  
344 determined by a matrix layer forming a flexible scaffold underneath the viral envelope, which is  
345 indispensable for particle formation and protects the encapsidated genome during transmission.  
346 Here, we investigate the molecular architecture of the EBOV VP40 matrix in Ebola virions during  
347 host cell entry to elucidate whether and how it is released from the viral envelope to allow virion  
348 uncoating. Using *in situ* cryo-electron tomography, we directly visualize EBOVs entering host cells  
349 via the endosomal route. Virions inside endosomal compartments exclusively exhibited  
350 disassembled VP40 matrices and some had engulfed endosomal vesicles, suggesting that the  
351 membranes of these virions are sufficiently flexible to engage in membrane fusion (Fig. 1).  
352 Considering that the nucleocapsids in all endosomal EBOVs were condensed, we propose that  
353 VP40 disassembly precedes membrane fusion, while nucleocapsid integrity is maintained until  
354 cytoplasmic entry is concluded. The VP40 aggregation surrounding the nucleocapsid may be  
355 involved in engaging cellular factors required to pull nucleocapsids out of the fusion site as has  
356 recently been suggested for influenza A virus, whose disassembled M1 matrix layer recruits the  
357 aggresome machinery by mimicking misfolded proteins<sup>21</sup>. Supported by our functional data and  
358 computational simulations, we propose that EBOV uncoating occurs in a cascade-like fashion.  
359 Tightly regulated by pH, uncoating starts with the disassembly of the VP40 layer, followed by GP-  
360 driven membrane fusion and release of the compact nucleocapsid into the cytoplasm. It remains  
361 to be elucidated when and how the nucleocapsid undergoes de-condensation to allow viral  
362 genome replication and transcription.

363 The organization of VP40 proteins within the VP40 matrix, including their oligomeric state and  
364 orientation of C-termini towards the membrane, has long been subject of debate<sup>34,48,52–55</sup>. While  
365 the structure of VP40 in solution was revealed as a dimer<sup>32</sup>, structures of VP40 in the context of  
366 lipid environments were proposed based on purified VP40 proteins either truncated or  
367 characterized in the presence of lipid mimics. These revealed VP40 hexamers as the building  
368 blocks of the VP40 matrix<sup>32,56,57</sup>, in which the C-termini alternately face the viral membrane.  
369 Recently published data<sup>28</sup> and our subtomogram averaging (Fig. 2) show that the VP40 matrix  
370 within VLPs is instead composed of linearly arranged dimers, in which all C-termini are facing the  
371 VLP membrane and thus collectively contribute to the electrostatic interactions. Importantly, a  
372 combination of MD simulations and subtomogram averaging allowed us to refine the structure of  
373 the VP40 dimer interacting with the membrane and to map the basic patch of lysine residues to  
374 flexible loops that extend into the inner membrane monolayer<sup>58</sup> (Fig. 3). Additionally, our MD

375 simulations reveal lipid-induced conformational changes of the VP40 dimer that complement our  
376 subtomogram averaging data. The rotation of VP40 monomers along the N-terminal-dimerization  
377 domain is in line with the structural data and emphasizes the modularity of the VP40 dimer, which  
378 may contribute to the flexibility of the large filamentous particles<sup>8,59</sup>.

379 Using VLPs of minimal protein composition (VP40 and GP, and VP40 alone), we show that  
380 VP40-disassembly, i.e. the detachment of the matrix from the viral envelope is triggered by low  
381 endosomal pH (Fig. 2). This indicates that VP40 disassembly does not depend on structural  
382 changes of other viral proteins and is driven solely by the acidic environment. Furthermore, we  
383 deduced VP40-lipid interaction strengths from the MD simulations, which are strongly diminished  
384 at pH 4.5 and thus support a dissociation of VP40 from the membrane in endosomal  
385 environments. Our data demonstrate that VP40 detachment from the membrane is driven by the  
386 neutralization of negatively charged phospholipids at endosomal pH. VP40 detachment from viral  
387 envelope is caused by a disruption of electrostatic interactions between VP40 and negatively  
388 charged lipids in the viral envelope, which have experimentally been demonstrated and attributed  
389 to a basic patch of lysine residues decorating the VP40 C-termini<sup>48-51</sup>. Considering that matrix  
390 protein assembly of other RNA viruses relies on electrostatic interactions with negatively charged  
391 lipids<sup>60</sup>, we propose that pH-mediated matrix disassembly is a general mechanism critical for viral  
392 uncoating.

393 Notably, pH-driven structural remodeling of viruses has so far only been shown and extensively  
394 studied for influenza A virus<sup>61</sup>, which is known to encode the viral ion channel M2 (reviewed  
395 here<sup>62</sup>). Since EBOVs do not encode a dedicated ion channel, we determined the permeability of  
396 the Ebola VLP membrane in comparison to the plasma membrane in the absence and presence  
397 of the M2 ion channel. We show that the proton permeability of the VLP membrane depends on  
398 particle morphology and is markedly lower in filamentous VLPs when compared to spherical VLPs  
399 (Fig. 4). Since spherical Ebola virions are predominantly released at very late infection time-points  
400 (4 days post infection) and are less infectious than filamentous particles<sup>63</sup>, it is plausible that their  
401 membrane properties including proton permeability result from improper particle formation due to  
402 cell exhaustion. The higher proton permeability of the plasma membrane already in the absence  
403 of M2 likely results from its complex composition comprising host cell ion channels<sup>64</sup>. While the  
404 membrane permeability of filamentous VLPs is low compared to values reported in the literature  
405 for protein-free liposomes<sup>37</sup>, pH equilibration inside filamentous virions is fast due to their small  
406 radius and takes place within minutes. This suggests that acidification occurs rapidly after EBOV  
407 uptake into late endosomes and is not rate-limiting during virus entry into host cells, in agreement  
408 with a previous report<sup>65</sup>. Taken together, we show that protons diffuse passively across the EBOV  
409 envelope, independent of a dedicated ion channel. It remains to be elucidated whether virion  
410 acidification also occurs by passive diffusion in other late-penetrating viruses lacking a dedicated  
411 ion channel.

412 We further show that the energy barriers of both the hemifusion stalk and fusion pore formation  
413 strongly depend on the VP40 matrix rigidity (Fig. 5). The assembled VP40 matrix inhibits stalk  
414 formation, which precedes fusion pore formation during membrane fusion, arguing for VP40  
415 disassembly as a critical step required for membrane fusion and highlighting the role of the matrix  
416 as a modulator of membrane fusion. Together, the findings presented here reveal a yet unknown  
417 role of viral matrix proteins during viral entry and uncoating as membrane fusion modulators. We  
418 propose that low-pH driven matrix protein disassembly is decisive for membrane fusion of other

419 enveloped late-penetrating viruses, making the process a promising target for interventions by  
420 development of virus matrixspecific weak base inhibitors.

## 421 **Materials and Methods**

### 422 *Cell lines and Ebola VLP production*

423 Cell lines used in this work include HEK 293T cells for Ebola virus-like particle (VLP) production,  
424 and Huh7 cells as target cells to assess VLP and EBOV entry. HEK 293T were obtained from  
425 ECACC General Cell Collection and Huh7 cells were kindly provided by Prof. Ralf Bartenschlager  
426 (Heidelberg University Hospital). Both cell lines were maintained in DMEM media (ThermoFisher  
427 Scientific) supplemented with 10% (v/v) FBS and 100 U/ml penicillin-streptomycin (ThermoFisher  
428 Scientific) at 37°C, 5% CO<sub>2</sub>. All cells were tested for Mycoplasma contamination every 3 months.  
429 Ebola VLPs were produced by transfecting HEK 293T cells with equal amounts of pCAGGS  
430 plasmids encoding EBOV GP, VP40, NP, VP35 and VP24 (species *Zaire ebolavirus*, Mayinga  
431 strain). Supernatants of transfected cells were harvested 48 h post transfection and clarified by  
432 centrifugation at 398 × g for 10 min, and 2168 × g for 15 min (JA-10 rotor, Beckmann). Clarified  
433 supernatants were passed through a 30 % sucrose cushion in HNE buffer (10 mM HEPES, 100  
434 mM NaCl, 1 mM EDTA, pH 7.4) by centrifugation for 2.5 h at 11,400 rpm (SW32 Ti rotor, Optima  
435 L-90K ultracentrifuge, Beckmann). Pellets were resuspended in HNE buffer and centrifuged at  
436 19,000 rpm (TLA 120.2 rotor, Optima TLX ultracentrifuge (Beckmann)) to remove residual media  
437 and sucrose. Final pellets were resuspended in HNE buffer and protein concentrations were  
438 measured using the Pierce BCA Protein Assay Kit (ThermoFisher Scientific) according to the  
439 manual provided by the manufacturer.

440 To produce reporter VLPs, pHluorin was N-terminally cloned to VP40 and beta-lactamase-VP40  
441 (BlaM-VP40) was a kind gift from Dr. Kartik Chandran. Reporter VLPs were produced by  
442 transfecting EBOV GP, VP40, and pHluorin-VP40 or BlaM-VP40 in a 10:10:1 ratio and purified  
443 as described above.

### 444 *Production of Ebola virus and infection of Huh7 cells*

445 EBOV (species *Zaire ebolavirus*, strain Mayinga) was produced in VeroE6 cells in the BSL4  
446 facility at the Friedrich-Loeffler Institut (Insel Riems, Greifswald), following approved standard  
447 operating procedures. 5 days post-infection, supernatants of infected cells were harvested and  
448 purified as described for the VLPs above, and then fixed by adding paraformaldehyde and  
449 glutaraldehyde in HNE buffer for a final concentration of 4% and 0.1%, respectively.

450 For structural characterization of EBOV- infected cells, Huh7 cells were seeded on 200 mesh  
451 Quantifoil™ SiO<sub>2</sub> R1.2/20 EM grids placed on 3D-printed grid holders in a 96-well plate.  
452 0.0075 × 10<sup>6</sup> cells were seeded, and the plates were transferred to the BSL4 laboratory after  
453 4-5 h. Cells were infected with unpurified EBOVs at an MOI of 0.1 and incubated for 48 h before  
454 chemical fixation for 24 h with 4 % paraformaldehyde and 0.1 % glutaraldehyde in PHEM buffer  
455 (60 mM PIPES, 25 mM HEPES, 2 mM MgCl<sub>2</sub>, 10 mM EGTA, pH 6.9). After transfer of the samples  
456 out of BSL4, the grids were kept in PHEM buffer and plunge-frozen within three days.

457 *Sample preparation for cryo-electron tomography*

458 Ebola VLPs and chemically fixed EBOV were plunge-frozen as previously described<sup>66</sup>. Briefly,  
459 VLPs were diluted to approximately 10-20 ng/ $\mu$ l, mixed with 10 nm protein A-coated colloidal gold  
460 (Aurion) and applied onto a glow-discharged EM grid (200 mesh, R 2/1, Quantifoil) prior to plunge-  
461 freezing with a Leica EM GP2 automatic plunge-freezer.

462 Chemically fixed EBOV-infected Huh7 cells on EM grids were vitrified using the GP2 plunge-  
463 freezer (Leica) at a ethane temperature of -183°C, chamber temperature of 25°C and 95%  
464 humidity. 5  $\mu$ l PHEM buffer were added to the grids before blotting them from the back with a  
465 Whatman Type 1 paper for 3 sec. For cryo-focused-ion beam (FIB) milling, the grids were clipped  
466 into specifically designed AutoGrids<sup>TM</sup> (ThermoFisher Scientific).

467 Cryo-FIB milling was performed as previously described<sup>25</sup> using an Aquilos dual-beam FIB-SEM  
468 microscope (ThermoFisher Scientific). Briefly, cells were selected for milling and coated with an  
469 organometallic platinum layer for 5 sec before milling in four successive steps using a gallium-ion  
470 beam at acceleration voltage 30 eV. Resulting lamellae were 200-250 nm thick.

471 *Tomogram acquisition, reconstruction, and volume rendering*

472 Cryo-ET of VLPs and lamellae of EBOV-infected Huh7 cells was performed as previously  
473 described<sup>67</sup>. Briefly, data were collected on a Titan Krios Transmission Electron Microscope  
474 (TEM, ThermoFisher Scientific) at Heidelberg University operated at 300 keV and equipped with  
475 a BioQuantum® LS energy filter with a slit width of 20 eV and K3 direct electron detector (Gatan).  
476 Tilt series were acquired at 33,000  $\times$  magnification (pixel size 2.671 Å) using a dose-symmetric  
477 acquisition scheme<sup>68</sup> with an electron dose of approximately 3 e<sup>-</sup>/Å<sup>2</sup> per projection with tilt ranges  
478 from 60° to -60° in 3° increments using SerialEM (Mastronarde, 2005) and a scripted dose-  
479 symmetric tilt-scheme (Hagen et al., 2017).

480 For subtomogram averaging, tomograms were acquired at EMBL Heidelberg using a Titan Krios  
481 TEM (ThermoFisher Scientific) operated at 300 keV and equipped with a Gatan Quantum 967 LS  
482 energy filter with a slit width of 20 eV and a Gatan K2xp detector. Tilt series were acquired at  
483 81,000  $\times$  magnification (pixel size 1.7005 Å) at a defocus range of -3 to -1.5  $\mu$ m using SerialEM  
484 (Mastronarde, 2005) and a scripted dose-symmetric tilt-scheme (Hagen et al., 2017) from -60°  
485 to 60° with 3° steps.

486 Tomograms were reconstructed using the IMOD software package<sup>69</sup>. Stacks of tomograms of  
487 VLPs were aligned using gold fiducials, and stacks of tomograms acquired on lamellae were  
488 aligned using patch tracking. After 3D contrast transfer function (CTF) correction and dose-  
489 filtration implanted in IMOD, the reconstruction was performed by weighted back-projections with  
490 a simultaneous iterative reconstruction technique (SIRT)-like filter equivalent to 10 iterations.  
491 Tomograms used for subtomogram averaging were reconstructed using 2D CTF correction by  
492 phase-flipping and weighted back-projection without a SIRT-like filter. For visualization, 10 slices  
493 of the final tomogram were averaged and low-pass filtered.

494 3D segmentation was performed using the Amira software and the implemented Membrane  
495 Enhancement Filter. Membranes were automatically segmented using the Top-hat tool and final  
496 segmentations were manually refined.

#### 497 *Subtomogram averaging*

498 Subtomogram averaging of the VP40 matrix was performed using the Dynamo software  
499 package<sup>70,71</sup>. Particles were automatically picked using the filament model and subtomograms  
500 were extracted with a cubic side length of 128 voxels from 23 tomograms. A reference template  
501 was obtained by iteratively aligning and averaging of 50 subtomograms using a mask permitting  
502 alignments only a membrane VP40 layer. The initial average was then used as a template for the  
503 final averaging of approximately 7,800 particles.

#### 504 *Molecular Dynamics Simulations*

505 We used the truncated (residues 45-311) crystallographic structure of the VP40 dimer deposited  
506 by Norris, M.J. et al. (pdb: 7JZJ<sup>28</sup>) for atomistic molecular dynamics simulations. The missing CTD  
507 loops were modeled using the GalxyFill software<sup>72</sup> within the CHARMM-GUI web server<sup>73</sup>. The  
508 protonation states of the proteins at pH 7.4 and 4.5 were calculated through the PROPKA web  
509 server<sup>74</sup>, which indicated a change in the protonation state at pH 4.5 for the following residues:  
510 E76, E325, H61, H124, H210, H269, H315. First, the proteins were simulated in water with a 0.1  
511 M NaCl for 1 microsecond. Next, the final structures were placed at a distance of 2 nm from a  
512 previously built model membrane surface containing POPC:POPS:CHOL (30:30:40) at ten  
513 different random orientations. The model membrane was made using the CHARMM-GUI  
514 membrane builder<sup>75</sup>. Since the percentage of POPS charged molecules at pH 4.5 is 10%<sup>33</sup>, we  
515 modelled the membrane at pH 4.5 by randomly replacing 90% of POPS molecules with its  
516 protonated model (POPSH). Then, each of the ten repeats was solvated with 40913 water  
517 molecules and 0.1 M NaCl. Next, charges were neutralized by adding or removing the needed  
518 amount of Na<sup>+</sup>- or CL<sup>-</sup>-ions. Finally, each system was simulated for 1 microsecond under NpT  
519 conditions. Four out of ten simulations, at both pH conditions, showed VP40 dimer binding to the  
520 membrane with the experimentally known binding residues, K224, K225, K274 and K275. These  
521 simulations were used for the analysis. For the production run, we employed the Parrinello-  
522 Rahman barostat<sup>76</sup> with a semi-isotropic pressure coupling scheme and a time constant set to 5.0  
523 ps to maintain the pressure constant. The pressure was set to 1.0 bar and the isothermal  
524 compressibility to  $4.5 \times 10^{-5} \text{ bar}^{-1}$ . The temperature was maintained at 310 K using the Nose-  
525 Hoover thermostat<sup>77</sup> with a time constant of 1.0 ps. Electrostatic interactions were handled using  
526 the PME method<sup>78</sup>. The cut-off length of 1.2 nm was used for electrostatic (real space component)  
527 and van der Waals interactions. Hydrogen bonds were constrained using the LINCS algorithm<sup>79</sup>.  
528 Finally, periodic boundary conditions were applied in all directions. The simulations were carried  
529 out using an integration time step of 2 fs with coordinates saved every 100 ps. All simulations  
530 have been carried out with the GROMACS-2021 software<sup>80</sup>. Protein, lipids, and salt ions were  
531 described using the CHARMM36m force field<sup>29-31</sup>. For water, we used the TIP3 model<sup>81</sup>. All  
532 pictures, snapshots, and movies were rendered with the Visual Molecular Dynamics (VMD)  
533 software<sup>82</sup>.

#### 534 *Free Energy Calculation*

535 The potential of mean force (PMF) for the VP40 dimer binding on a model membrane surface was  
536 calculated using an atomistic resolution, employing the umbrella sampling protocol<sup>83,84</sup>. The initial  
537 configuration for each umbrella window was taken directly from unbiased MD simulations. The



538 centre of the mass distance between the VP40 dimer and the phosphate atoms of one leaflet was  
539 used as the reaction coordinate. A total of 49 windows, 0.1 nm spaced, were generated and  
540 simulated with a harmonic restraint force constant of 2000 kJ·mol<sup>-1</sup>·nm<sup>-2</sup> for 200 nanoseconds.  
541 The first 100 ns of the simulations were considered as an equilibration phase and discarded from  
542 the actual free energy calculation. The free energy profiles were reconstructed using the Weighted  
543 Histogram Analysis Method<sup>85</sup>. The statistical error was estimated with 200 bootstrap analyses.

#### 544 *Dihedral angle calculation*

545 The rotation angle of VP40 monomers along the NTD-dimerization domain is defined as the angle  
546 between the plane containing the vector connecting alpha carbon atoms of L75<sup>monomer1</sup> and  
547 T112<sup>monomer1</sup> and the vector connecting atoms T112<sup>monomer1</sup> and T112<sup>monomer2</sup> and the plane  
548 containing this second vector and the vector connecting atoms T112<sup>monomer2</sup> and L75<sup>monomer2</sup> as  
549 explained in Fig. S3, A. The angle has been calculated rerunning the simulations trajectory with  
550 a GROMACS version patched with the open-source, community-developed PLUMED library<sup>86</sup>,  
551 version 2.4<sup>87</sup>. The angle measurement in water has been calculated using all simulation frames.  
552 For the angle calculation upon the binding to the membrane, the last 100ns of the four simulations  
553 showing VP40-membrane interaction via the experimentally known critical residues (i.e., K224,  
554 K225, K274, and K275), have been used.

555 Regardless of pH, VP40 monomers within the dimer are flexible with a rotation angle, defined as  
556 the torsional angle around the alpha carbons of residue T112 of the two monomers (Fig. S2),  
557 oscillating around 1° (SD 9.5) in water, which is 17° smaller of the one measured for the  
558 crystallographic structure (pdb: 7jzj; Fig. S2). VP40 dimer flexibility is not constrained upon  
559 binding to the membrane, however, after binding to the bilayer, the angle distribution was  
560 significantly ( $p \leq 0.0001$ ) shifted to a value of 3.7° (SD 8.1) and 4.5° (SD 10.7) at pH 7.4 and 4.5  
561 respectively.

#### 562 *Lipidomics of Ebola VLPs*

563 Ebola VLPs composed of GP, VP40 and the nucleocapsid proteins NP, VP24 and VP35 were  
564 produced from HEK 293T cells and purified as described above. They were used at a final protein  
565 concentration of 880 ng/μl for lipidomics analysis. VLPs were subjected to lipid extractions using  
566 an acidic liquid-liquid extraction method<sup>88</sup> as described in Malek et al., 2021<sup>89</sup>. In order to ensure  
567 that similar amounts of lipids were extracted, a test extraction was performed to determine the  
568 concentration of PC as a bulk membrane lipid. Quantification was achieved by adding 1-3 internal  
569 lipid standards for each lipid class, with the standards resembling the structure of the endogenous  
570 lipid species. Of note, sample volumes were adjusted to ensure that all lipid standard to lipid  
571 species ratios were in a linear range of quantification. Typically, the standard to species ratios  
572 were within a range of >0.1 to <10. Following this approach, a relative quantification of lipid  
573 species was performed. Lipid standards were added prior to extractions, using a master mix  
574 consisting of 50 pmol phosphatidylcholine (PC, 13:0/13:0, 14:0/14:0, 20:0/20:0; 21:0/21:0, Avanti  
575 Polar Lipids), 50 pmol sphingomyelin (SM, d18:1 with N-acylated 13:0, 17:0, 25:0, semi-  
576 synthesized<sup>90</sup>, 100 pmol deuterated cholesterol (D7-cholesterol, Cambridge Isotope Laboratory),  
577 30 pmol phosphatidylinositol (PI, 17:0/ 20:4, Avanti Polar Lipids), 25 pmol  
578 phosphatidylethanolamine (PE) and 25 pmol phosphatidylserine (PS) (both 14:1/14:1, 20:1/20:1,  
579 22:1/22:1, semi-synthesized<sup>90</sup>, 25 pmol diacylglycerol (DAG, 17:0/17:0, Larodan), 25 pmol

580 cholesteryl ester (CE, 9:0, 19:0, 24:1, Sigma), and 24 pmol triacylglycerol (TAG, LM-6000/D5-  
581 17:0,17:1,17:1, Avanti Polar Lipids), 5 pmol ceramide (Cer, d18:1 with N-acylated 14:0, 17:0, 25:0,  
582 semi-synthesized<sup>90</sup> or Cer d18:1/18:0-D3, Matreya) and 5 pmol glucosylceramide (HexCer)  
583 (d18:1 with N-acylated 14:0, 19:0, 27:0, semi-synthesized or GlcCer d18:1/17:0, Avanti Polar  
584 Lipids), 5 pmol lactosylceramide (Hex2Cer, d18:1 with N-acylated C17 fatty acid), 10 pmol  
585 phosphatidic acid (PA, 17:0/20:4, Avanti Polar Lipids), 10 pmol phosphatidylglycerol (PG,  
586 14:1/14:1, 20:1/20:1, 22:1/22:1, semi-synthesized<sup>90</sup> and 5 pmol lysophosphatidylcholine (LPC,  
587 17:1, Avanti Polar Lipids). The final CHCl<sub>3</sub> phase was evaporated under a gentle stream of  
588 nitrogen at 37 °C. Samples were either directly subjected to mass spectrometric analysis, or were  
589 stored at -20 °C prior to analysis, which was typically done within 1-2 days after extraction. Lipid  
590 extracts were resuspended in 10 mM ammonium acetate in 60 µl methanol. Two µl aliquots of the  
591 resuspended lipids were diluted 1:10 in 10 mM ammonium acetate in methanol in 96-well plates  
592 (Eppendorf twin tec 96) prior to measurement. For cholesterol determinations, the remaining lipid  
593 extract was again evaporated and subjected to acetylation as previously described<sup>91</sup>. Samples  
594 were analysed on an QTRAP 6500+ mass spectrometer (Sciex) with chip-based (HD-D ESI Chip,  
595 Advion Biosciences) electrospray infusion and ionization via a Triversa Nanomate (Advion  
596 Biosciences). MS settings and scan procedures are listed in Supplementary table T2. Data  
597 evaluation was done using LipidView (Sciex) and an in-house-developed software (ShinyLipids).

#### 598 *Calibration of pHluorin fluorescence*

599 HEK 293T cells were reverse transfected and seeded at a seeding density of 0.02 x 10<sup>6</sup> cells per  
600 well in a 96 well plate. Briefly, transfection mixtures were prepared containing a pCAGGS plasmid  
601 encoding pHluorin-VP40. After 15 min incubation at RT, HEK 293T cells were trypsinized and  
602 mixed with the transfection complexes before seeding on a fibronectin-coated 96 well plate. HNE  
603 buffers (10 mM HEPES, 100 mM NaCl, 1 mM EDTA) were prepared and calibrated to a pH of 3,  
604 3.5, 4, 4.5, 5, 5.5, 6, 6.5, 7, 7.34, 7.52 and 8. Approximately 20 h post seeding, media was  
605 removed, the cells were washed once with HNE buffer at pH 7.34, and incubated for 45 min at  
606 37°C, 5% CO<sub>2</sub>, in the different HNE buffers. Fluorescence intensities were measured at 488 nm  
607 excitation using a Tecan plate-reader. To calibrate the fluorescence of pHluorin at different pH,  
608 fluorescence was plotted against the pH.

#### 609 *Permeability of the HEK 293T cell plasma membrane*

610 HEK 293T cells were reverse transfected as described above using pCAGGS plasmids encoding  
611 pHluorin-VP40 and influenza M2 at a molar ratio of 1:0, 1:0.0002, 1:0.002 and 1:0.2.  
612 Approximately 20 h post seeding, the media was removed, and cells were washed once with HNE  
613 buffer, pH 7.34. The buffer was then exchanged with HNE buffer calibrated to pH 4.5 and  
614 fluorescence was immediately measured in 15 s intervals using a Tecan plate-reader.

#### 615 *Time-lapse microscopy of Ebola VLPs*

616 Time-lapse microscopy was performed using a Leica SP8 confocal microscope with a 63 × oil  
617 immersion objective. Purified pHluorin-labelled VLPs were added to a glow-discharged µ-Slide 8

618 well dish (ibidi) at a protein concentration of 10 ng/ $\mu$ l and were allowed to settle for 20 min at RT.  
619 They were then imaged using a 488 nm excitation laser and emission at 500-600 nm. Z-stacks  
620 were acquired in 15 s intervals for 30 min. To assess acidification kinetics, citric acid was added  
621 at a final concentration of 2.6 mM two min after starting the data acquisition. To assess  
622 acidification kinetics in the absence of the viral membrane, VLPs were incubated for 5 min with  
623 TritonX-100 at a final concentration of 0.1% before imaging.

## 624 Membrane permeability theory

625 We estimate the membrane permeability based on the geometry and pH equilibrium time of the  
626 VLPs. The membrane total proton flux,  $I$ , is proportional to the area of the VLPs,  $A_{VLP}$ , ion  
627 concentration difference between the buffer,  $C_B$ , and VLPs,  $C_{VLP}$ ,  $\Delta C(t) = C_B - C_{VLP}(t)$ , and  
628 membrane permeability coefficient  $P_m$ <sup>37</sup>,

$$629 \quad I = P_m \cdot A_{VLP} \cdot \Delta C(t) \quad (1)$$

630 It is easy to show that the protons concentration difference decays exponentially with time  $t$ ,

$$631 \quad \Delta C(t) = \Delta C_0 \cdot e^{-\frac{t}{\tau}} \quad (2)$$

632 With the decay time constant  $\tau = \frac{V_{VLP}}{P_m \cdot A_{VLP}}$ ,  $V_{VLP}$  the volume of the VLPs and  $\Delta C_0$  the initial  
633 concentration difference. The pH level is the logarithm of the protons concentration and can be  
634 related to the concentration difference as follows:

$$635 \quad \text{pH}_{VLP}(t) = \text{pH}_{\text{Buffer}} - \log_{10} \left[ 1 - \frac{\Delta C_0}{C_B} \cdot e^{-\frac{t}{\tau}} \right] \quad (3)$$

636 Next, we use a least-squares minimization procedure to fit the measured pH to Eq. 3. We find the  
637 three minimization parameters  $\text{pH}_{\text{Buffer}}$ ,  $\frac{\Delta C_0}{C_B}$  and  $\tau$ . Since the VLPs are either spherical or  
638 filamentous, we can derive the membrane permeability coefficient  $P_m = \frac{R}{n \cdot \tau}$ , with  $R$  the respective  
639 radius and  $n$  is either 2 for filamentous VLPs or 3 for spherical VLPs and cells. The fitted decay  
640 times  $\tau$  are presented in Fig. S3 B and the VLPs radii are found using cryo-ET (Fig. S3). In line  
641 with previous measurements of Ebola VLPs and virions<sup>8</sup>, the filamentous VLPs had an average  
642 radius of  $34 \pm 4.5$  nm ( $n = 90$ ), while spherical particles are more heterogeneous in size, with a  
643 radius of  $426 \pm 100$  nm ( $n = 12$ ). A similar analysis was also performed on HEK 293T cells. The  
644 cells had a round shape. The radius was estimated using fluorescence microscopy to be  $17.5 \pm$   
645  $2.5$  nm.

## 646 Membrane fusion in the presence of a matrix layer

647 The fusion process involves three players – the membrane, the matrix layer, and the fusion  
648 proteins. In the following section, we describe the physical properties of these three, their  
649 interaction, and the fusion pathway in the presence of a matrix layer. We determine the effect of

650 the matrix layer on fusion rate by calculating the magnitude of the two major energy barriers to  
651 membrane fusion<sup>41,42,92</sup> – stalk formation and fusion pore expansion in the presence of the matrix  
652 layer and compare it to the matrix-free state.

653 *Description of the fusion site and the fusion process:* The fusion reaction starts when the fusion  
654 proteins bring the EBOV and endosomal membranes to proximity and drive the merger of only  
655 the proximal monolayers. As a result, the membrane and matrix layer deform and locally detach.  
656 The fusion site is axially-symmetric; its cross-section is illustrated in Figure 4B. The two fusing  
657 membranes form a junction in the center of the stalk, with the two membrane mid-planes forming  
658 a corner with a 45° angle. As a result, the lipid tails are sheared and splayed to prevent voids in  
659 the hydrocarbon tail moiety<sup>93</sup>. The shear and splay magnitude decays within several nanometers  
660 from the stalk and smoothly connects to the flat surrounding membranes. After the stalk has  
661 formed, it radially expands to an equilibrium radius  $R_D$  by bringing the two inner monolayers into  
662 contact along a joint mid-plane, a state called hemifusion diaphragm<sup>94,95</sup>. The rim of the diaphragm  
663 is the three-way junction between the diaphragm and the two fusing membranes. The lipid  
664 monolayer deformations are continuous; therefore, we explicitly require that the magnitude of lipid  
665 splay, saddle-splay, and shear are continuous everywhere in our numerical calculations. The  
666 matrix layer adheres to the membrane by electrostatic interaction, and it can locally detach from  
667 it at the vicinity of the stalk and the diaphragm rim junction to avoid substantial deformation there.  
668 Thus, the matrix is not necessarily parallel to the membrane and can bend independently. The  
669 deformation of both the membranes and the matrix layer vanishes at the edge of the fusion site  
670 and connects smoothly to a flat surrounding membrane and matrix layer. The membrane fluidity  
671 in the lateral direction allows the matrix layer to slide on it freely as the fusion process progresses.  
672 The fusion reaction ends by opening and expending a membrane pore within the diaphragm,  
673 which must involve the detachment of the favorable bounds between the EBOV luminal  
674 monolayer and the VP40 matrix layer.

675 *The lipid membrane:* We model the lipid membrane using the well-established theory of lipid tilt,  
676 splay, and saddle-splay<sup>43,44</sup>. The membrane is composed of two monolayers that share a joint  
677 mid-plane. The orientation of the lipids in the two monolayers is independent and is given by the  
678 lipid director vector,  $\hat{n}$ . The lipid tilt vector,  $\vec{t} = \frac{\hat{n}}{\hat{n} \cdot \hat{N}} - \hat{N}$ , characterizes the shear magnitude and its  
679 direction<sup>96</sup>, with  $\hat{N}$  the midplane normal. The monolayer dividing plane is parallel to the membrane  
680 midplane and is located at a distance of  $\delta = \delta_0 \sqrt{1 + \vec{t}^2}$  from it, with  $\delta_0$  the length of the  
681 undeformed monolayer tails. The lipid splay and saddle splay are derived from the splay tensor,  
682  $\tilde{b}_\alpha^\beta = \nabla_\alpha n^\beta$ , where the sub- and superscripts denote, respectively, the co- and contravariant  
683 components in the local coordinate basis of the monolayer dividing plane<sup>44</sup>. Lipid splay is the trace  
684 of the splay tensor  $\tilde{J} = \tilde{b}_\alpha^\alpha$ , and lipid saddle-splay is its determinant  $\tilde{K} = \det \tilde{b}_\alpha^\beta$ . The energy  
685 density with respect to the flat tilt-free configuration associated with these deformations is given  
686 by<sup>44,97</sup>,

687

$$f_m = \frac{1}{2} \kappa (\tilde{J}^2 - 2\tilde{J}J_{sm}) + \bar{\kappa} \tilde{K} + \frac{1}{2} \kappa_t \vec{t}^2. \quad (4)$$

688 The bending rigidity of the monolayer,  $\kappa_m$ , has a typical value of  $10 k_B T^{98}$ , the saddle-splay  
 689 modulus,  $\bar{\kappa}_m$ , and tilt modulus,  $\kappa_t$  cannot be directly measured and are indirectly estimated. The  
 690 ratio between saddle-splay modulus and bending rigidity is between -1 to  $0^{97,99}$ . The ratio between  
 691 the bending rigidity to tilt modulus gives a typical tilt decay length of  $l = \sqrt{\kappa/\kappa_t}$ , typically between  
 692 1 to 2 nm<sup>100</sup>. Here we use  $l = 1.5$  nm and  $\bar{\kappa}/\kappa = -0.5$ . The monolayer spontaneous curvature,  
 693  $J_{sm}$ , is the averaged intrinsic curvature of its constituting lipids,

$$694 \quad \sum_{i=1}^{i=M} \zeta_i \phi_i. \quad (5)$$

695 With  $M$  the total number of lipid components,  $\zeta_i$ , and  $\phi_i$  are the intrinsic curvature and mole  
 696 fraction of the  $i$  lipid components, respectively. The lipid composition is found using lipidomic data  
 697 of the endosomal and viral membranes (Fig. 1 J). The intrinsic curvature of the most abundant  
 698 lipids are  $\zeta_{PC} \approx -0.1 \text{ nm}^{-1}$  for phosphatidylcholine (PC)<sup>101,102</sup>, cholesterol  $\zeta_{CHOL} \approx$   
 699  $-0.5 \text{ nm}^{-1}$ <sup>101,103</sup>, phosphatidylethanolamine (PE) with  $\zeta_{PE} \approx -0.35 \text{ nm}^{-1}$ <sup>103,104</sup> and  
 700 sphingomyelin  $\zeta_{SM} \approx -0.1 \text{ nm}^{-1}$ <sup>104</sup>. We find that the endosomal and Ebola virus both have  
 701 monolayer spontaneous curvature of roughly  $J_{sm} = -0.22 \text{ nm}^{-1}$ .

702 The overall membrane deformation energy is given by the integration of Eq. 4 over the area of  
 703 both monolayers independently,

$$704 \quad F_{Mem} = \int f_+ dA_+ + \int f_- dA_- \quad (6)$$

705 The first and second integrals in Eq. 6 are performed over the upper and lower monolayers area,  
 706 respectively.

707 *The matrix layer:* We model the matrix layer as a thin, uniform rigid elastic shell with a flat resting  
 708 configuration. The matrix can avoid the sharp corners in the vicinity of the stalk and diaphragm  
 709 rim by local detachment from the membrane. These allow the matrix to avoid strong shear  
 710 deformations. The elastic energy of matrix deformation up to quadratic order in the area strain,  $\epsilon$ ,  
 711 and in principle curvatures,  $c_1$  and  $c_2$ , is given by<sup>105</sup>,

$$712 \quad F_{mat} = \frac{Yd}{2(1-\nu)} \int \frac{1}{2} \epsilon^2 dA_0 + \frac{Yd^3}{12(1-\nu^2)} \int \left[ \frac{1}{2} (c_1 + c_2)^2 - (1-\nu)c_1 \cdot c_2 \right] dA \quad (7)$$

713 With  $dA_0$  and  $dA$  the area elements of the undeformed and deformed states,  $d$  the matrix  
 714 thickness,  $Y$  Young's modulus,  $\nu$  the Poisson's ratio. We consider only stretching and bending  
 715 deformations and explicitly prohibit shear. The thickness of the VP40 matrix layer is estimated to  
 716 be  $d = 4$  nm based on the cryo-EM tomography (Fig. 1 A-H). The Young's modulus and Poisson  
 717 ratio of the VP40 matrix layer was never measured, but we estimate them to be within the same  
 718 magnitude as other viruses with similar matrix layer structures, such as M1 of Influenza virus. The  
 719 VP40 matrix layer Poisson's ratio is taken as  $\nu = 0.5$ , and the Young's modulus is in the range 5-  
 720 22 MPa<sup>106,107</sup>. With that, we estimate the stretching modulus of the VP40 matrix layer in the range

721 of  $\frac{Yd}{2(1-\nu)} \sim 20 \rightarrow 80$  mN/m, and the pure bending contribution with modulus in the range of

$$722 \quad \frac{Yd^3}{24(1-\nu^2)} \sim 8 \rightarrow 35 k_B T.$$

723 The matrix layer and the membrane can locally detach in the vicinity of the stalk and diaphragm  
724 rim to avoid substantial deformation there. Besides these regions, the matrix interacts  
725 continuously with the membrane since the VP40 matrix layer is tightly packed. Inspired by the MD  
726 simulations (Fig. 2E), we describe the VP40-membrane interaction energy density with Lennard-  
727 Jones-like potential,

$$728 \quad U_{int} = \int u_0 \left[ \left( \frac{z_0}{z} \right)^{12} - 2 \left( \frac{z_0}{z} \right)^6 \right] dA \quad (8)$$

729 With the integral performed on the area of the matrix layer,  $dA$ .  $z$  is the distance from the  
730 monolayer dividing plane to the mid-plane of the VP40 layer,  $z_0 = 4$  nm is the resting length  
731 obtained from sub-tomogram averaging and the MD simulations (Fig. 4 H). The interaction energy  
732 density,  $u_0$ , is estimated from the MD simulations as the free energy of a single VP40 dimer at  
733  $z = z_0$  (11  $k_B T$  for pH 7.4 and 6.5  $k_B T$  for pH 4.5, Fig. 2 E) divided by the density of VP40 dimers  
734 obtained from the cryo-EM data (Figure 1 I), we find  $u_0 = 0.2 k_B T \cdot \text{nm}^{-2}$  at pH 7.4 and  $u_0 =$   
735  $0.1 k_B T \cdot \text{nm}^{-2}$  at pH 4.5.

736 *Way of computation:* Our computational approach is based on many previous works<sup>95,108</sup> and  
737 published as open-source code on GitHub ([https://github.com/GonenGolani/Fusion\\_Solver](https://github.com/GonenGolani/Fusion_Solver)),  
738 where further details can be found. The calculation involves three parts – we start by simulating  
739 the stalk shape and find its minimal energy configuration. Next, we allow the stalk to expand to  
740 the hemifusion diaphragm, and finally, we calculate the energy barrier of pore formation based on  
741 the membrane stress and the interaction energy with the VP40 matrix layer in the diaphragm.

742 The stalk energy barrier represents the minimal mechanical work needed to merge the proximal  
743 monolayers. We calculate the hemifusion stalk shape and its formation energy by setting the  
744 membrane in stalk configuration. Then, we minimize the sum of the membrane and matrix  
745 interaction deformation energies (Eq. 7-8) while requiring that  $R_D = 0$ ,

$$746 \quad E_{stalk}^* = \min[F_{Mem} + F_{mat} + U_{int}] \quad (9)$$

747 After the stalk has formed, we release the constrain on  $R_D$  and allow the system to spontaneously  
748 relaxes to a hemifusion diaphragm. The matrix layer can remain attached to the diaphragm or  
749 detached.

750 We calculate the fusion-pore formation energy barrier based on the stress in the hemifusion  
751 diaphragm. To facilitate our computation, we assume that the pore formation is initiated at the  
752 center of the diaphragm and that the fast fluctuation in pore size does not change the hemifusion  
753 diaphragm and matrix layer equilibrium shapes. The pore must expand to the majority of the  
754 diaphragm before it overcomes the critical energy, so the initiation point is mainly irrelevant to the  
755 magnitude energy barrier. However, since the pores are more likely to form in the vicinity of the  
756 diaphragm rim, where stress is maximal, our estimation should be considered a slight  
757 overestimation of the actual energy barrier. With this assumption, the energy of pore opening to  
758 radius  $\rho$  is thus given by,

759 
$$E_{pore}(\rho) = 2\pi\rho\lambda - \pi \int_{\rho'=0}^{\rho'= \rho} \gamma(\rho')\rho' d\rho', \quad (10)$$

760 With  $\lambda$  the pore rim line-tension magnitude is independent of the matrix layer or the membrane  
761 shape. In our simulations, we take it to be  $\lambda = 12 \text{ pN}^{109}$ . The second term in Eq. 10 is the energy  
762 gained by removing lipids from the stressed diaphragm and relocating them to the surrounding  
763 membranes. The stress contains two contributions: the relaxation of the splay, saddle-splay, and  
764 shear of the lipids compared to the surrounding membranes and the detachment from the matrix  
765 layer,

766 
$$\gamma(\rho) = f_+(\rho) + f_-(\rho) + u(\rho). \quad (11)$$

767 With  $f_+$  and  $f_-$  the energy deformation density of the upper and lower monolayer (Eq. 4),  
768 respectively, and  $u$  the interaction energy density with the matrix (Eq. 8). The pore formation  
769 energy barrier is the maxima of  $E_{pore}(\rho)$ ,

770 
$$E_{pore}^*(\rho = \rho^*) = \max[E_{pore}]. \quad (12)$$

771 We find the stress (Eq. 11) based on the equilibrium shape of the diaphragm, and Eq. 12 is  
772 found by numerically integrating Eq. 10 and finding the maximum.

### 773 *Beta-lactamase assay*

774 Huh7 cells were seeded on a 96 well plate coated with 2  $\mu\text{g}$  fibronectin in 1 x PBS at a density of  
775  $0.02 \times 10^6$  cells per well. 24 h post seeding, the media of inhibitor-treated cells was replaced with  
776 25 mM  $\text{NH}_4\text{Cl}_4$  in DMEM media (ThermoFisher Scientific) supplemented with 10% (v/v) FBS and  
777 100 U/ml penicillin-streptomycin (ThermoFisher Scientific) and cells were incubated for 1.5 h at  
778  $37^\circ\text{C}$ , 5%  $\text{CO}_2$ .

779 Same amounts of purified beta-lactamase (BlaM)-containing VLPs were either untreated, treated  
780 with low pH, thermolysin or a combination of low pH and thermolysin. For the thermolysin-  
781 treatment, 500  $\mu\text{g}/\text{ml}$  thermolysin (ThermoFisher Scientific), reconstituted in  $\text{H}_2\text{O}$  and filtered  
782 through a 0.22  $\mu\text{m}$  membrane filter, were added to the VLPs for 30 min at  $37^\circ\text{C}$ . To quench the  
783 reaction, 300  $\mu\text{g}/\text{ml}$  phosphoramidon were added for 10 min at  $37^\circ\text{C}$ . For the low pH-treatment,  
784 citric acid prepared in HNE buffer (10 mM HEPES, 100 mM NaCl, 1 mM EDTA) was added in a  
785 final concentration of 1.67 mM to the VLPs for 30 min at  $37^\circ\text{C}$ . The BlaM-VLPs were immediately  
786 placed on ice until infection.

787 For infection, the media of all cells was removed, 50  $\mu\text{l}$  pre-treated BlaM-VLP solution were added  
788 to each well and the plate was centrifuged for 30 min at 200 g,  $20^\circ\text{C}$  (Beckmann). BlaM-VLP  
789 solutions were immediately removed and replaced with 100  $\mu\text{l}$  media with and without 25 mM  
790  $\text{NH}_4\text{Cl}$ . Cells were incubated for 1.5 h at  $37^\circ\text{C}$ , 5%  $\text{CO}_2$ , before freshly preparing the BlaM dye  
791 from the LiveBLAzer™ FRET-B/G Loading Kit with CCF4-AM (ThermoFisher Scientific)  
792 supplemented with probenecid (Invitrogen) according to the protocol provided by the  
793 manufacturer. 20  $\mu\text{l}$  of the BlaM mix were added per well. After incubation at  $11^\circ\text{C}$  for 12-14 h,  
794 the cells were briefly checked for viability using a Nikon microscope and detached for 5-10 min

795 using trypsin-EDTA at 37°C. Cells were harvested and washed with 3 x with PBS before  
796 performing FACS using a BD FACS Celesta Cell Analyzer (BD Biosciences).

## 797 **Acknowledgements**

798 We thank the Infectious Diseases Imaging Platform (IDIP) at the Center for Integrative Infectious  
799 Disease Research Heidelberg and the cryo-EM network at the Heidelberg University (HD-  
800 cryoNET) for support and assistance; the Electron Microscopy Core Facility at EMBL and Wim  
801 Hagen for data acquisition; Dimitrios Papagiannidis for critical reading of the manuscript. Plasmids  
802 encoding BlaM-VP40 and pHluorin were a kind gift from Kartik Chandran and Gero Miesenböck,  
803 respectively. CSC-IT Centre for Science Ltd. (Espoo, Finland) is acknowledged for excellent  
804 computational resources. The authors gratefully acknowledge the data storage service SDS@hd  
805 supported by the Ministry of Science, Research, and the Arts Baden-Württemberg (MWK), the  
806 German Research Foundation (DFG) through grant INST 35/1314-1 FUGG and INST 35/1503-1  
807 FUGG.

### 808 *Funding:*

809 We gratefully acknowledge funding from the Chica and Heinz Schaller Foundation (to PC and  
810 SLW), the Minerva Stiftung (GG), DFG (SFB/TRR 83, project A5 to WN, FL), (240245660 – SFB  
811 1129 to OTF, BB, USS and PC), (278001972 – TRR 186 and project number 112927078 – TRR  
812 83 to BB), (VA 1570/1-1 to MV).

### 813 *Author contributions:*

814 **SLW:** Conceptualization; Investigation and formal analysis (cloning of reporter constructs, VLP  
815 production, (in situ) cryo-ET of VLPs and EBOV-infected host cells, subtomogram averaging,  
816 confocal microscopy, BlaM assay); Visualization; Writing - Original Draft. Writing - Review &  
817 Editing. **GG:** Investigation and formal analysis (membrane modelling and theory, membrane  
818 permeability theory and analysis); Visualization; Writing - Original Draft. Writing - Review &  
819 Editing. **FL:** Investigation and formal analysis (MD simulations design, computational resources,  
820 data curation, methodology). **MV:** Investigation (in situ cryo-ET of EBOV-infected host cells);  
821 Writing - Review & Editing. **KT:** Investigation (BlaM assay). **SSA:** Investigation (acquisition of  
822 FACS data). **CL:** Investigation (lipidomics). **OTF:** Writing – Review & Editing. **BB:** Writing –  
823 Review & Editing. **TH:** Investigation (infection of host cells with EBOV, purification of EBOV);  
824 Writing – Review & Editing. **WN:** Writing – Review & Editing. **USS:** Supervision; Writing – Review  
825 & Editing. **PC:** Conceptualization; Funding acquisition; Supervision; Writing - Original Draft;  
826 Writing - Review & Editing.

### 827 *Competing interests:*

828 The authors declare no competing interests.

### 829 *Data and materials availability:*

830 Electron tomography data were deposited to EMDB (EMD-15268, EMD-15244) and will be  
831 available upon  
832 publication. Additional data and material related to this publication may be obtained upon request.



## 833 References

- 834 1. Feldmann, H. & Klenk, H. D. Marburg and Ebola viruses. *Advances in virus research* **47**, 1–52 (1996).  
835 2. Geisbert, T. W. & Jahrling, P. B. Differentiation of filoviruses by electron microscopy. *Virus Res.* **39**, 129–150 (1995).  
836 3. Bharat, T. A. M. *et al.* Structural dissection of Ebola virus and its assembly determinants using cryo-electron tomography.  
837 *Proc. Natl. Acad. Sci.* **109**, 4275–4280 (2012).  
838 4. Amiar, S. *et al.* Lipid-specific oligomerization of the Marburg virus matrix protein VP40 is regulated by two distinct interfaces  
839 for virion assembly. *J. Biol. Chem.* **296**, (2021).  
840 5. Johnson, K. A., Taghon, G. J. F., Scott, J. L. & Stahelin, R. V. The Ebola Virus matrix protein, VP40, requires  
841 phosphatidylinositol 4,5-bisphosphate (PI(4,5)P<sub>2</sub>) for extensive oligomerization at the plasma membrane and viral egress.  
842 *Sci. Rep.* **6**, 1–14 (2016).  
843 6. Gc, J. B., Gerstman, B. S., Stahelin, R. V. & Chapagain, P. P. The Ebola virus protein VP40 hexamer enhances the  
844 clustering of PI(4,5)P<sub>2</sub> lipids in the plasma membrane. *Phys. Chem. Chem. Phys.* **18**, 28409–28417 (2016).  
845 7. Noda, T. *et al.* Ebola virus VP40 drives the formation of virus-like filamentous particles along with GP. *J. Virol.* **76**, 4855–65  
846 (2002).  
847 8. Wan, W. *et al.* Ebola and marburg virus matrix layers are locally ordered assemblies of VP40 dimers. *Elife* **9**, 1–22 (2020).  
848 9. Takamatsu, Y., Kolesnikova, L. & Becker, S. Ebola virus proteins NP, VP35, and VP24 are essential and sufficient to  
849 mediate nucleocapsid transport. *Proc. Natl. Acad. Sci. U. S. A.* **115**, 1075–1080 (2018).  
850 10. Wan, W. *et al.* Structure and assembly of the Ebola virus nucleocapsid. *Nat. Publ. Gr.* **551**, (2017).  
851 11. Greber, U. F., Singh, I. & Helenius, A. *Mechanisms of virus uncoating.* (1994).  
852 12. Yamauchi, Y. & Greber, U. F. Principles of Virus Uncoating: Cues and the Snooker Ball. *Traffic* **17**, 569–592 (2016).  
853 13. Lee, J. E. & Saphire, E. O. Ebolavirus glycoprotein structure and mechanism of entry. *Futur. Virol.* **4**, 621–635 (2009).  
854 14. Dube, D. *et al.* The Primed Ebolavirus Glycoprotein (19-Kilodalton GP 1,2): Sequence and Residues Critical for Host Cell  
855 Binding. *J. Virol.* **83**, 2883–2891 (2009).  
856 15. Nanbo, A. *et al.* Ebolavirus is internalized into host cells via macropinocytosis in a viral glycoprotein-dependent manner.  
857 *PLoS Pathog.* (2010). doi:10.1371/journal.ppat.1001121  
858 16. Brecher, M. *et al.* Cathepsin Cleavage Potentiates the Ebola Virus Glycoprotein To Undergo a Subsequent Fusion-  
859 Relevant Conformational Change. *J. Virol.* **86**, 364–372 (2012).  
860 17. Carette, J. E. *et al.* Ebola virus entry requires the cholesterol transporter Niemann-Pick C1. *Nature* **477**, 340–343 (2011).  
861 18. Côté, M. *et al.* Small molecule inhibitors reveal Niemann-Pick C1 is essential for Ebola virus infection. *Nature* **477**, 344–348  
862 (2011).  
863 19. Miller, E. H. *et al.* Ebola virus entry requires the host-programmed recognition of an intracellular receptor. *EMBO J.* **31**,  
864 1947–1960 (2012).  
865 20. Simmons, J. A. *et al.* Ebolavirus Glycoprotein Directs Fusion through NPC1- Endolysosomes. *J. Virol.* **90**, 605–610 (2016).  
866 21. Banerjee, I. *et al.* Influenza A virus uses the aggresome processing machinery for host cell entry. *Science (80-. )*. **346**,  
867 473–477 (2014).  
868 22. Li, S. *et al.* PH-ntrolled two-step uncoating of influenza virus. *Biophys. J.* **106**, 1447–1456 (2014).  
869 23. Lozach, P. Y., Huotari, J. & Helenius, A. Late-penetrating viruses. *Curr. Opin. Virol.* **1**, 35–43 (2011).  
870 24. van Niel, G. *et al.* Apolipoprotein E Regulates Amyloid Formation within Endosomes of Pigment Cells. *Cell Rep.* **13**, 43–51  
871 (2015).  
872 25. Klein, S. *et al.* Post-correlation on-lamella cryo-CLEM reveals the membrane architecture of lamellar bodies. (2020).  
873 doi:10.1101/2020.02.27.966739  
874 26. Mahamid, J. *et al.* Liquid-crystalline phase transitions in lipid droplets are related to cellular states and specific organelle  
875 association. *Proc. Natl. Acad. Sci. U. S. A.* **116**, 16866–16871 (2019).  
876 27. Wan, W. *et al.* Structure and assembly of the Ebola virus nucleocapsid. *Nat. Int. J. Sci.* **551**, 394–397 (2017).  
877 28. Wan, W. *et al.* Ebola and Marburg virus matrix layers are locally ordered assemblies of VP40 dimers. *bioRxiv* 1–13 (2020).  
878 29. Pastor, R. W. & MacKerell, A. D. Development of the CHARMM force field for lipids. *Journal of Physical Chemistry Letters*  
879 **2**, 1526–1532 (2011).  
880 30. Huang, J. & Mackerell, A. D. CHARMM36 all-atom additive protein force field: Validation based on comparison to NMR  
881 data. *J. Comput. Chem.* **34**, 2135–2145 (2013).  
882 31. Huang, J. *et al.* CHARMM36m: An improved force field for folded and intrinsically disordered proteins. *Nat. Methods* **14**,  
883 71–73 (2016).  
884 32. Bornholdt, Z. A. *et al.* Structural rearrangement of ebola virus vp40 begets multiple functions in the virus life cycle. *Cell* **154**,  
885 763–774 (2013).  
886 33. Tsui, F. C., Ojcius, D. M. & Hubbell, W. L. The intrinsic pKa values for phosphatidylserine and phosphatidylethanolamine in  
887 phosphatidylcholine host bilayers. *Biophys. J.* **49**, 459–468 (1986).  
888 34. Stahelin, R. V. Membrane binding and bending in Ebola VP40 assembly and egress. *Frontiers in Microbiology* **5**, (2014).  
889 35. Panchal, R. G. *et al.* In vivo oligomerization and raft localization of Ebola virus protein VP40 during vesicular budding. *Proc.*  
890 *Natl. Acad. Sci. U. S. A.* **100**, 15936–15941 (2003).  
891 36. Miesenböck, G., De Angelis, D. A. & Rothman, J. E. *Visualizing secretion and synaptic transmission with pH-sensitive*

- 892 *green fluorescent proteins*. (1998).
- 893 37. Deamer, D. W. & Bramhall, J. Permeability of lipid bilayers to water and ionic solutes. *Chem. Phys. Lipids* **40**, 167–188
- 894 (1986).
- 895 38. Deamer, D. W. Proton permeation of lipid bilayers. *J. Bioenerg. Biomembr.* **19**, 457–479 (1987).
- 896 39. Chernomordik, L. V., Zimmerberg, J. & Kozlov, M. M. Membranes of the world unite! *J. Cell Biol.* **175**, 201–207 (2006).
- 897 40. Harrison, S. C. Viral membrane fusion. *Nature Structural and Molecular Biology* **15**, 690–698 (2008).
- 898 41. Jahn, R. & Grubmüller, H. Membrane fusion. *Curr. Opin. Cell Biol.* **14**, 488–495 (2002).
- 899 42. Chernomordik, L. V. & Kozlov, M. M. Mechanics of membrane fusion. *Nat. Struct. Mol. Biol.* **2008** *157* **15**, 675–683 (2008).
- 900 43. Helfrich, W. Elastic Properties of Lipid Bilayers: Theory and Possible Experiments. *Zeitschrift für Naturforsch. - Sect. C J.*
- 901 *Biosci.* **28**, 693–703 (1973).
- 902 44. Hamm, M. & Kozlov, M. M. Elastic energy of tilt and bending of fluid membranes. *Eur. Phys. J. E* **3**, 323–335 (2000).
- 903 45. Jones, D. M. & Padilla-Parra, S. The  $\beta$ -lactamase assay: Harnessing a FRET biosensor to analyse viral fusion
- 904 mechanisms. *Sensors (Switzerland)* **16**, (2016).
- 905 46. Stauffer, C. E. The effect of pH on thermolysin activity. *Arch. Biochem. Biophys.* **147**, 568–570 (1971).
- 906 47. Mingo, R. M. *et al.* EBOV and SARS-CoV Display Late Cell Entry Kinetics: Evidence that Transport to NPC1 +
- 907 Endolysosomes Is a Rate-Defining Step. *J. Virol.* **89**, 2931–2943 (2015).
- 908 48. Del Vecchio, K. *et al.* A cationic, C-terminal patch and structural rearrangements in Ebola virus matrix VP40 protein control
- 909 its interactions with phosphatidylserine. (2018). doi:10.1074/jbc.M117.816280
- 910 49. Bornholdt, Z. A. *et al.* Structural rearrangement of ebola virus vp40 begets multiple functions in the virus life cycle. *Cell* **154**,
- 911 763–774 (2013).
- 912 50. Ruigrok, R. W. H. *et al.* Structural characterization and membrane binding properties of the matrix protein VP40 of Ebola
- 913 virus. *J. Mol. Biol.* **300**, 103–112 (2000).
- 914 51. Lee, J. *et al.* Ebola virus glycoprotein interacts with cholesterol to enhance membrane fusion and cell entry. *Nat. Struct.*
- 915 *Mol. Biol.* **28**, (2021).
- 916 52. Soni, S. P. & Stahelin, R. V. The Ebola Virus Matrix Protein VP40 Selectively Induces Vesiculation from
- 917 Phosphatidylserine-enriched Membranes. *J. Biol. Chem.* **289**, 33590–33597 (2014).
- 918 53. Adu-Gyamfi, E. *et al.* The ebola virus matrix protein penetrates into the plasma membrane: A key step in viral protein 40
- 919 (VP40) oligomerization and viral egress. *J. Biol. Chem.* **288**, 5779–5789 (2013).
- 920 54. Pavadai, E., Gerstman, B. S. & Chapagain, P. P. A cylindrical assembly model and dynamics of the Ebola virus VP40
- 921 structural matrix. *Sci. Rep.* **8**, 9776 (2018).
- 922 55. Scianimanico, S. *et al.* Membrane association induces a conformational change in the Ebola virus matrix protein. *EMBO J.*
- 923 **19**, 6732–6741 (2000).
- 924 56. Scianimanico, S. *et al.* Membrane association induces a conformational change in the Ebola virus matrix protein. *EMBO J.*
- 925 **19**, 6732–6741 (2000).
- 926 57. Nguyen, T. L. *et al.* An all-atom model of the pore-like structure of hexameric VP40 from Ebola: Structural insights into the
- 927 monomer-hexamer transition. *J. Struct. Biol.* **151**, 30–40 (2005).
- 928 58. GC, J. B., Gerstman, B. S. & Chapagain, P. P. Membrane association and localization dynamics of the Ebola virus matrix
- 929 protein VP40. *Biochim. Biophys. Acta - Biomembr.* **1859**, 2012–2020 (2017).
- 930 59. Booth, T. F., Rabb, M. J. & Beniac, D. R. How do filovirus filaments bend without breaking? *Trends Microbiol.* **21**, 583–593
- 931 (2013).
- 932 60. Norris, M. J. *et al.* Measles and Nipah virus assembly: Specific lipid binding drives matrix polymerization. *Sci. Adv.* **8**,
- 933 (2022).
- 934 61. Fontana, J. & Steven, A. C. At Low pH, Influenza Virus Matrix Protein M1 Undergoes a Conformational Change Prior to
- 935 Dissociating from the Membrane. *J. Virol.* **87**, 5621–5628 (2013).
- 936 62. Manzoor, R., Igarashi, M. & Takada, A. Influenza A Virus M2 Protein: Roles from Ingress to Egress. *Int. J. Mol. Sci.* **18**,
- 937 (2017).
- 938 63. Welsch, S., Kolesnikova, L., Krähling, V., Riches, J. D. & Becker, S. Electron Tomography Reveals the Steps in Filovirus
- 939 Budding. *PLoS Pathog* **6**, 1000875 (2010).
- 940 64. DeCoursey, T. E. Voltage-Gated Proton Channels. *Cell. Mol. Life Sci.* **65**, 2554 (2008).
- 941 65. Mingo, R. M. *et al.* Ebola Virus and Severe Acute Respiratory Syndrome Coronavirus Display Late Cell Entry Kinetics:
- 942 Evidence that Transport to NPC1 + Endolysosomes Is a Rate-Defining Step. *J. Virol.* **89**, 2931–2943 (2015).
- 943 66. Winter, S. L. & Chlanda, P. Dual-axis Volta phase plate cryo-electron tomography of Ebola virus-like particles reveals actin-
- 944 VP40 interactions. *J. Struct. Biol.* **213**, 107742 (2021).
- 945 67. Klein, S. *et al.* SARS-CoV-2 structure and replication characterized by in situ cryo-electron tomography. *Nat. Commun.* **1–**
- 946 **10** (2020). doi:10.1101/2020.06.23.167064
- 947 68. Hagen, W. J. H., Wan, W. & Briggs, J. A. G. Implementation of a cryo-electron tomography tilt-scheme optimized for high
- 948 resolution subtomogram averaging. *J. Struct. Biol.* **197**, 191–198 (2017).
- 949 69. Mastronarde, D. N. & Held, S. R. Automated tilt series alignment and tomographic reconstruction in IMOD. *J. Struct. Biol.*
- 950 **197**, 102–113 (2017).
- 951 70. Castaño-Díez, D., Kudryashev, M., Arheit, M. & Stahlberg, H. Dynamo: A flexible, user-friendly development tool for
- 952 subtomogram averaging of cryo-EM data in high-performance computing environments. *J. Struct. Biol.* **178**, 139–151

- 953 (2012).
- 954 71. Castaño-Díez, D. The Dynamo package for tomography and subtomogram averaging: Components for MATLAB, GPU  
955 computing and EC2 Amazon Web Services. in *Acta Crystallographica Section D: Structural Biology* **73**, 478–487 (2017).
- 956 72. Coutsias, E. A., Seok, C., Jacobson, M. P. & Dill, K. A. A Kinematic View of Loop Closure. *J. Comput. Chem.* **25**, 510–528  
957 (2004).
- 958 73. Jo, S., Kim, T., Iyer, V. G. & Im, W. CHARMM-GUI: A web-based graphical user interface for CHARMM. *J. Comput. Chem.*  
959 **29**, 1859–1865 (2008).
- 960 74. Søndergaard, C. R., Olsson, M. H. M., Rostkowski, M. & Jensen, J. H. Improved treatment of ligands and coupling effects  
961 in empirical calculation and rationalization of p K a values. *J. Chem. Theory Comput.* **7**, 2284–2295 (2011).
- 962 75. Jo, S., Lim, J. B., Klauda, J. B. & Im, W. CHARMM-GUI membrane builder for mixed bilayers and its application to yeast  
963 membranes. *Biophys. J.* **97**, 50–58 (2009).
- 964 76. Parrinello, M. & Rahman, A. Polymorphic transitions in single crystals: A new molecular dynamics method. *J. Appl. Phys.*  
965 **52**, 7182–7190 (1981).
- 966 77. Hoover, W. G. Canonical dynamics: Equilibrium phase-space distributions. *Phys. Rev. A* **31**, 1695–1697 (1985).
- 967 78. Essmann, U. *et al.* A smooth particle mesh Ewald method. *J. Chem. Phys.* **103**, 8577–8593 (1995).
- 968 79. Hess, B., Bekker, H., Berendsen, H. J. C. & Fraaije, J. G. E. M. LINCS: A linear constraint solver for molecular simulations.  
969 *J. Comput. Chem.* **18**, 1463–1472 (1997).
- 970 80. Abraham, M. J. *et al.* Gromacs: High performance molecular simulations through multi-level parallelism from laptops to  
971 supercomputers. *SoftwareX* **1–2**, 19–25 (2015).
- 972 81. Jorgensen, W. L., Chandrasekhar, J., Madura, J. D., Impey, R. W. & Klein, M. L. Comparison of simple potential functions  
973 for simulating liquid water. *J. Chem. Phys.* **79**, 926–935 (1983).
- 974 82. Humphrey, W., Dalke, A. & Schulten, K. VMD: Visual molecular dynamics. *J. Mol. Graph.* **14**, 33–38 (1996).
- 975 83. Torrie, G. M. & Valleau, J. P. Monte Carlo free energy estimates using non-Boltzmann sampling: Application to the sub-  
976 critical Lennard-Jones fluid. *Chem. Phys. Lett.* **28**, 578–581 (1974).
- 977 84. Torrie, G. M. & Valleau, J. P. Nonphysical sampling distributions in Monte Carlo free-energy estimation: Umbrella sampling.  
978 *J. Comput. Phys.* **23**, 187–199 (1977).
- 979 85. Hub, J. S., De Groot, B. L. & Van Der Spoel, D. G-whams-a free Weighted Histogram Analysis implementation including  
980 robust error and autocorrelation estimates. *J. Chem. Theory Comput.* **6**, 3713–3720 (2010).
- 981 86. Bonomi, M. *et al.* Promoting transparency and reproducibility in enhanced molecular simulations. *Nat. Methods* **2019** **168**  
982 **16**, 670–673 (2019).
- 983 87. Tribello, G. A., Bonomi, M., Branduardi, D., Camilloni, C. & Bussi, G. PLUMED 2: New feathers for an old bird. *Comput.*  
984 *Phys. Commun.* **185**, 604–613 (2014).
- 985 88. Blight, E. G. & Dyer, W. J. A rapid method of total lipid extraction and purification. *Can. J. Biochem. Physiol.* **37**, 911–917  
986 (1959).
- 987 89. Malek, M. *et al.* Inositol triphosphate-triggered calcium release blocks lipid exchange at endoplasmic reticulum-Golgi  
988 contact sites. *Nat. Commun.* **12**, (2021).
- 989 90. Özbalci, C., Sachsenheimer, T. & Brügger, B. Quantitative analysis of cellular lipids by nano-electrospray ionization mass  
990 spectrometry. *Methods Mol. Biol.* **1033**, 3–20 (2013).
- 991 91. Liebisch, G. *et al.* High throughput quantification of cholesterol and cholesteryl ester by electrospray ionization tandem  
992 mass spectrometry (ESI-MS/MS). *Biochim. Biophys. Acta - Mol. Cell Biol. Lipids* **1761**, 121–128 (2006).
- 993 92. Fuhrmans, M., Marelli, G., Smirnova, Y. G. & Müller, M. Mechanics of membrane fusion/pore formation. *Chem. Phys.*  
994 *Lipids* **185**, 109–128 (2015).
- 995 93. Kozlovsky, Y. & Kozlov, M. M. Stalk model of membrane fusion: Solution of energy crisis. *Biophys. J.* **82**, 882–895 (2002).
- 996 94. Kozlovsky, Y., Chernomordik, L. V. & Kozlov, M. M. Lipid intermediates in membrane fusion: Formation, structure, and  
997 decay of hemifusion diaphragm. *Biophys. J.* **83**, 2634–2651 (2002).
- 998 95. Golani, G. *et al.* Myomerger promotes fusion pore by elastic coupling between proximal membrane leaflets and hemifusion  
999 diaphragm. *Nat. Commun.* **12**, 1–18 (2021).
- 1000 96. Hamm, M. & Kozlov, M. M. Tilt model of inverted amphiphilic mesophases. *Eur. Phys. J. B* **6**, 519–528 (1998).
- 1001 97. Terzi, M. M., Ergüder, M. F. & Deserno, M. A consistent quadratic curvature-tilt theory for fluid lipid membranes. *J. Chem.*  
1002 *Phys.* **151**, 164108 (2019).
- 1003 98. Dimova, R. Recent developments in the field of bending rigidity measurements on membranes. *Advances in Colloid and*  
1004 *Interface Science* **208**, 225–234 (2014).
- 1005 99. Templer, R. H., Khoo, B. J. & Seddon, J. M. Gaussian Curvature Modulus of an Amphiphilic Monolayer. *Langmuir* **14**,  
1006 7427–7434 (1998).
- 1007 100. Terzi, M. M. & Deserno, M. Novel tilt-curvature coupling in lipid membranes. *J. Chem. Phys.* **147**, 084702 (2017).
- 1008 101. Chen, Z. & Rand, R. P. The influence of cholesterol on phospholipid membrane curvature and bending elasticity. *Biophys.*  
1009 *J.* **73**, 267–276 (1997).
- 1010 102. Szule, J. A., Fuller, N. L. & Peter Rand, R. The effects of acyl chain length and saturation of diacylglycerols and  
1011 phosphatidylcholines on membrane monolayer curvature. *Biophys. J.* **83**, 977–984 (2002).
- 1012 103. Kollmitzer, B., Heffberger, P., Rappolt, M. & Pabst, G. Monolayer spontaneous curvature of raft-forming membrane lipids.  
1013 *Soft Matter* **9**, 10877–10884 (2013).

- 1014 104. Leikin, S., Kozlov, M. M., Fuller, N. L. & Rand, R. P. Measured effects of diacylglycerol on structural and elastic properties  
1015 of phospholipid membranes. *Biophys. J.* **71**, 2623–2632 (1996).  
1016 105. Landau, L. D. & Lifshitz, E. M. *Theory of Elasticity*. (Pergamon PRes, 1970).  
1017 106. Li, S., Eghiaian, F., Sieben, C., Herrmann, A. & Schaap, I. A. T. Bending and Puncturing the Influenza Lipid Envelope.  
1018 *Biophys. J.* **100**, 637–645 (2011).  
1019 107. Schaap, I. A. T., Eghiaia, F., Des George, A. & Veigel, C. Effect of Envelope Proteins on the Mechanical Properties of  
1020 Influenza Virus. *J. Biol. Chem.* **287**, 41078–41088 (2012).  
1021 108. Zucker, B., Golani, G. & Kozlov, M. Model for ring closure in ER tubular network dynamics - BioRxiv. *bioRxiv* 102–104  
1022 (2021). doi:10.4324/9780203619308-15  
1023 109. Portet, T. & Dimova, R. A new method for measuring edge tensions and stability of lipid bilayers: Effect of membrane  
1024 composition. *Biophys. J.* **99**, 3264–3273 (2010).  
1025

## 1026 Supplementary Figures

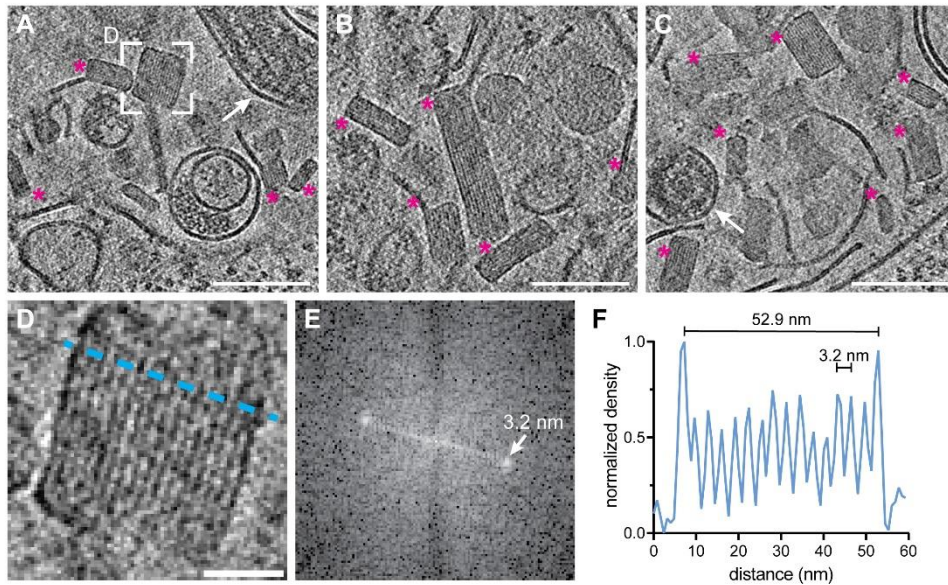

1027

### 1028 Fig. S1

#### 1029 Crystalline lipidic structures in endosomal compartments of EBOV-infected Huh7 cells.

1030 (A-C) Slices through tomograms showing lumina of endosomal compartments crowded with  
1031 crystalline lipidic structures (magenta asterisks). Two virions are highlighted with white arrows in  
1032 (A) and (C). (D) Magnified view of the area highlighted in (A) showing a cross-section through a  
1033 crystalline lipidic structure. To determine the spacing between the stacked lipid monolayers, a line  
1034 profile was determined (blue line). (E) Fourier-transform analysis of the tomogram slice shown in  
1035 (D) revealing a spacing of 3.2 nm. (F) Line profile across the crystal shown in (D) showing the the  
1036 diameter of the structure along the short axis of 52.9 nm, and the regular 3.2 nm spacing of the  
1037 lipid monolayers. Scale bars 100 nm (A-C), (D) 20 nm.

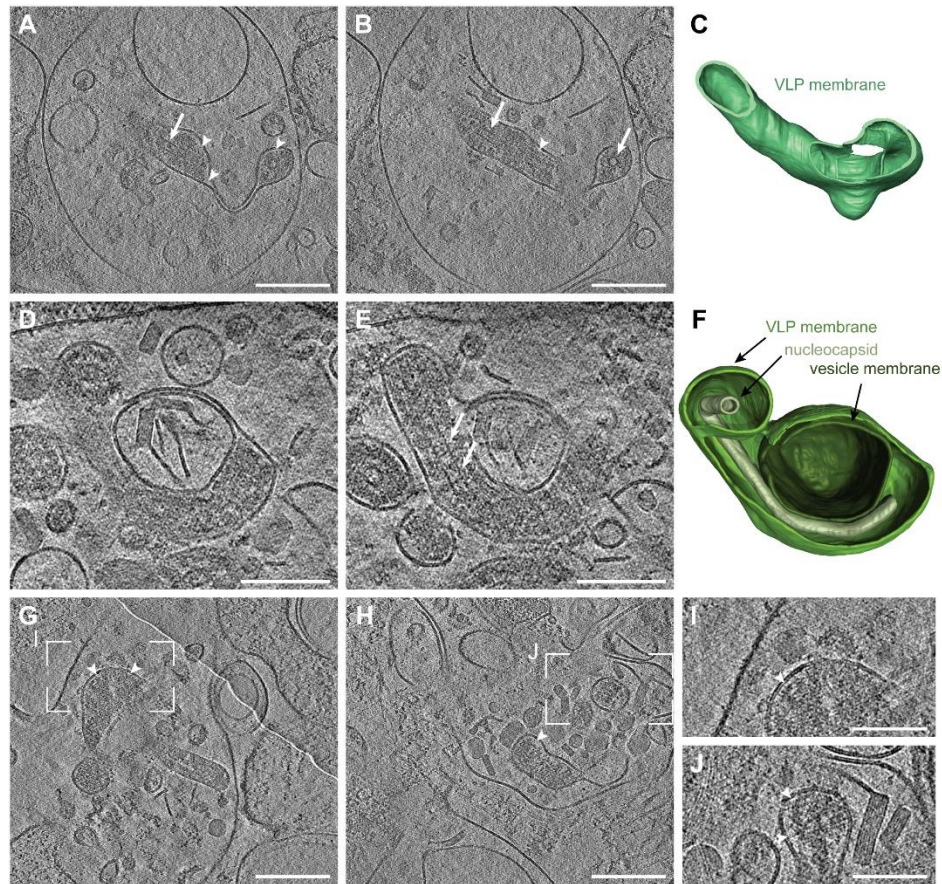

1038

1039 **Fig. S2**

1040 **In situ cryo-ET of EBOV infecting Huh7 cells.** Slices through tomograms showing Ebola virions  
1041 inside late endosomal compartments. All virions display condensed nucleocapsids (white arrows)  
1042 and disassembled VP40 layers, which have detached from the viral membrane as apparent from  
1043 the gap adjacent to the inner lipid monolayer (white arrowheads). **(A-B)** Different slices through  
1044 the same tomogram showing an internalized EBOV with a disassembled VP40 matrix and highly  
1045 flexible membrane. The nucleocapsid is still condensed (white arrow). **(C)** 3D segmentation of the  
1046 malleable lipid envelope of the EBOV shown in (A) and (B). **(D-E)** Different slices through the  
1047 same tomogram showing an internalized EBOV with a disassembled VP40 matrix and condensed  
1048 nucleocapsid. The virion had engulfed an intraluminal vesicle containing cholesterol ester  
1049 crystals, indicating that this virus has undergone fusion. **(F)** 3D segmentation of EBOV shown in  
1050 (D) and (E) showing the viral membrane (green), nucleocapsid (light green) and vesicle  
1051 membrane (dark green). Scale bars: (A), (B) 200 nm, (D-J): 100 nm.

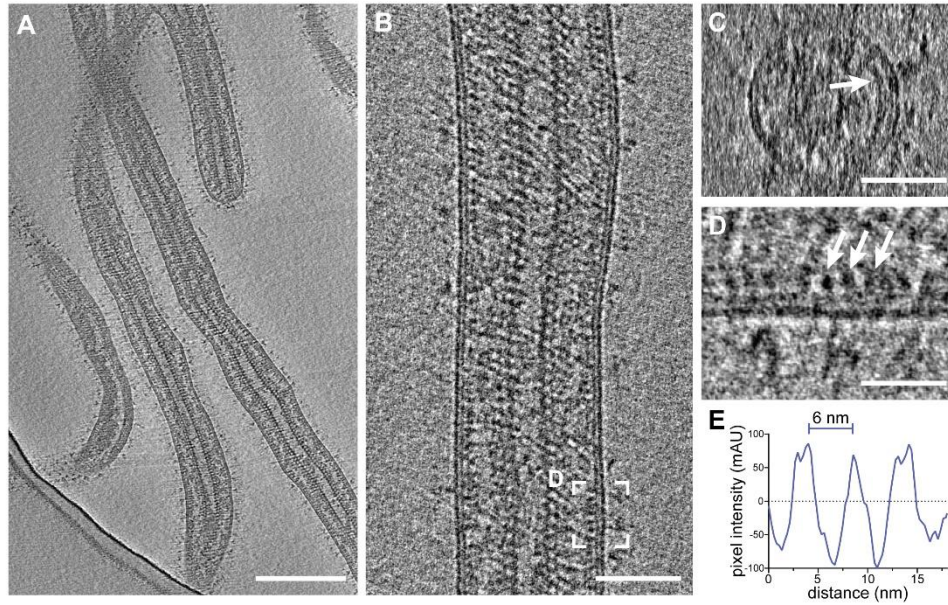

1052

1053 **Fig. S3**

1054 **Cryo-electron tomography of purified and chemically fixed EBOV. (A)** Slices through a  
1055 tomogram showing an overview of filamentous virions. Condensed and decorated nucleocapsids  
1056 span the length of each virion. **(B-C)** Longitudinal and transverse cross-section, respectively, of  
1057 a tomogram containing a filamentous EBOV. **(C)** Transverse cross-section of the virion shown in  
1058 (B). The VP40 matrix adjacent to the inner membrane monolayer is highlighted by a white arrow.  
1059 **(D)** Area highlighted in (B) showing a longitudinal cross-section at higher magnification to highlight  
1060 the VP40 densities lining the inner membrane monolayer. **(E)** Line profile determined adjacent to  
1061 the inner monolayer of the virion shown in (B) showing the approximately 6 nm pitch of the VP40  
1062 matrix. Scale bars: (A), (B): 200 nm, (C): 50 nm, (D): 20 nm.

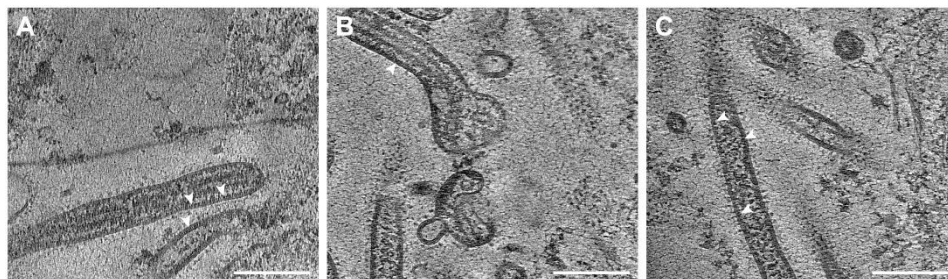

1063

1064 **Fig. S4**

1065 **In situ cryo-ET of budding and released EBOV from infecting Huh7 cells. (A-C)** Slices  
1066 through tomograms showing Ebola virions adjacent to the plasma membrane of infected Huh7  
1067 cells. All virions contain assembled VP40 layers as apparent from the regular densities  
1068 the inner lipid monolayer at the luminal side (white arrowheads). Scale bars: 200 nm.

1069

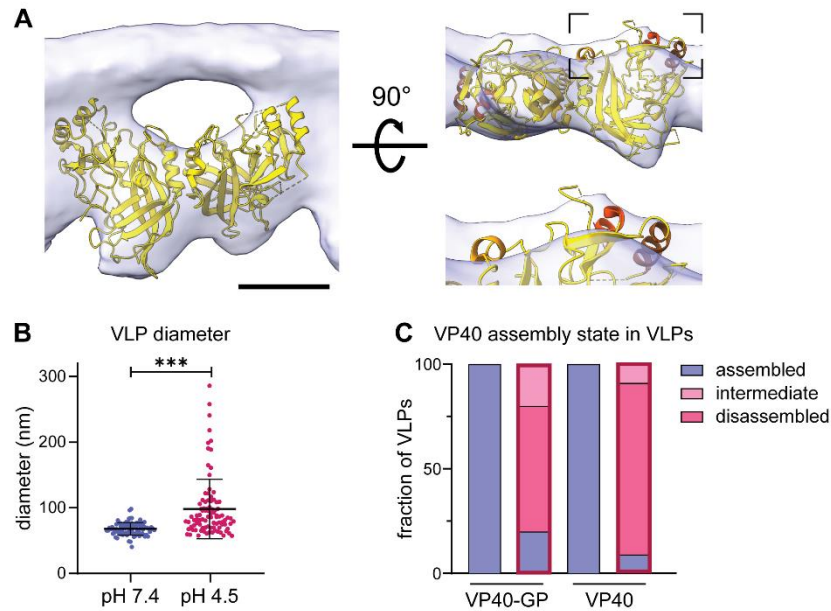

1070

1071 **Fig. S5**

1072 **Structural characterization of the VP40 matrix in VLPs by cryo-ET. (A)** VP40 dimer structure  
1073 (pdb: 7jzj) fitted into the subtomogram average presented in Fig. 2 from the side view including  
1074 the density of the inner VLP monolayer and rotated by 90°. Helical segments protruding from the  
1075 subtomogram average are highlighted in shades of orange. **(B)** Diameter of VLPs composed of  
1076 GP and VP40 measured from membrane-to-membrane after incubation at pH 7.4 and pH 4.5.  
1077 Asterisks indicate statistical significance as judged by a two-tailed Welch's t-test, assuming  
1078 unequal variance ( $p < 0.0001$ ). **(C)** Quantification of the VP40 assembly state of VLPs composed  
1079 of VP40 and GP ( $n = 37$  at pH 7.4 and 18 at pH 4.5); or VP40 alone ( $n = 22$  at pH 7.4 and 8 at pH  
1080 4.5). The VP40 matrix was either assembled (blue), attached to parts of the VLP membrane  
1081 (intermediate, pink) or disassembled (dark pink). VP40 assembly in VLPs subjected to neutral or  
1082 low pH (bars with red frame) was assessed by cryo-ET. Scale bars: (A) 2.5 nm.



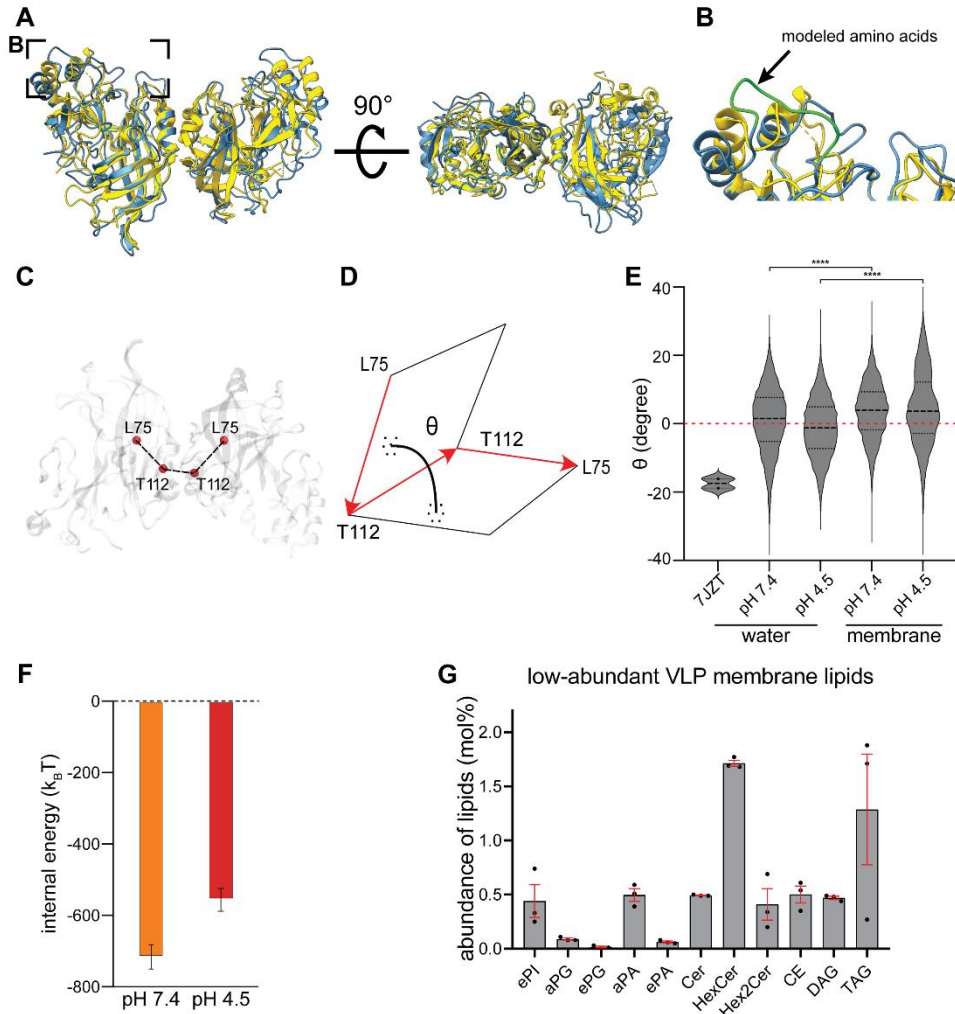

1083

1084 **Fig. S6**

1085 **Characterization of VP40 dimer angles and lipidomics.** (A) Superimposition of the  
 1086 crystallographic structure (pdb: 7jzj, yellow) with the membrane bound VP40 structure from the  
 1087 MD simulations (blue). (B) The area highlighted in (A) shows the missing CDTs residues  
 1088 computationally modeled (green). (C) Representation of the rotation angle of VP40 monomers  
 1089 along the NTD-dimerization domain. (D) The dihedral angle between VP40 monomers is defined  
 1090 as the angle between the plane containing the vector connecting alpha carbon atoms of  
 1091 L75monomer1 and T112monomer1 and the vector connecting atoms T112monomer1 and  
 1092 T112monomer2 and the plane containing this second vector and the vector connecting atoms  
 1093 T112monomer2 and L75monomer2. (E) Dihedral angle distribution shows that, regardless of pH,  
 1094 VP40 monomers within the dimer are flexible with a rotation angle oscillating around 1° (SD 9.5)  
 1095 in water, which is 17° smaller than the one measured for the crystallographic structure (pdb: 7jzj).  
 1096 VP40 dimer flexibility is not constrained upon binding to the membrane. However, after binding to  
 1097 the bilayer, the angle distribution was significantly ( $p \leq 0.0001$ ) shifted to a value of 3.7° and 4.5°  
 1098 at pH 7.4 and 4.5, respectively. Unpaired t-tests were performed to evaluate the significance of  
 1099 differences in angle distributions. (F) VP40-membrane internal energy calculated as the sum of  
 1100 short-range Coulomb and Lennard-Jonson interactions at neutral (orange) and low (red) pH. The  
 1101 internal energies have been calculated over the last 100 ns of the biased MD simulation windows

1102 centered at the membrane distance where the free energy minima were reconstructed (3.0 nm  
1103 and 2.7 nm for neutral and low pHs, respectively). The error was estimated using the block  
1104 averages over 5 blocks. **(G)** Abundance of low-abundant lipids in the envelope of Ebola VLPs  
1105 composed of GP, VP40, NP, VP24 and VP35. The mean abundance in mol% and values for each  
1106 experiment (n=3) are plotted together with the standard error of the mean (red).  
1107 phosphatidylinositol (PI), phosphatidylglycerol (PG), phosphatidic acid (PA), ceramide (Cer),  
1108 hexosylceramide (HexCer), cholesterol ester (CE) diacylglycerol (DAG), triacylglycerol (TAG).  
1109 Prefix “a” indicates acyl-linked glycerophospholipids, prefix “e” indicates ether-linked (plasmalogen)  
1110 or the presence of one odd and one even chain fatty acyl.  
1111  
1112  
1113

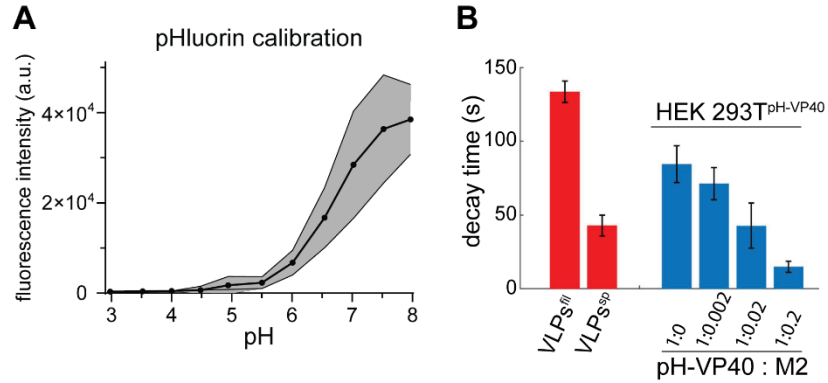

1114

1115 **Fig. S7**

1116 **Calibration of pHluorin fluorescence and decay times. (A)** Fluorescence intensity of HEK  
1117 293T cells expressing pHluorin-VP40 measured at 488 nm as a function of pH. Cells were grown  
1118 in cell culture media before exchanging the media with HNE buffer (10 mM HEPES, 100 mM  
1119 NaCl, 1 mM EDTA) at different pH. **(B)** pH characteristic decay times as found by fitting the pH  
1120 levels to Eq. 3 of VLPs (red) and HEK 293T cells (blue) expressing pHluorin-VP40 and influenza  
1121 M2 in increasing M2 levels. Filamentous VLPs 134±7 sec (n=154), spherical VLPs 43±7 sec  
1122 (n=66), cells expressing VP40 only 84±12 sec (n=44), cells expressing VP40 and M2 at 1:0.002  
1123 molar ratio 71±11 sec (n=30), cells expressing VP40 and M2 at 1:0.02 molar ratio 43±15 sec  
1124 (n=28), cells expressing VP40 and M2 at 1:0.2 molar ratio 15±4 sec (n=26).

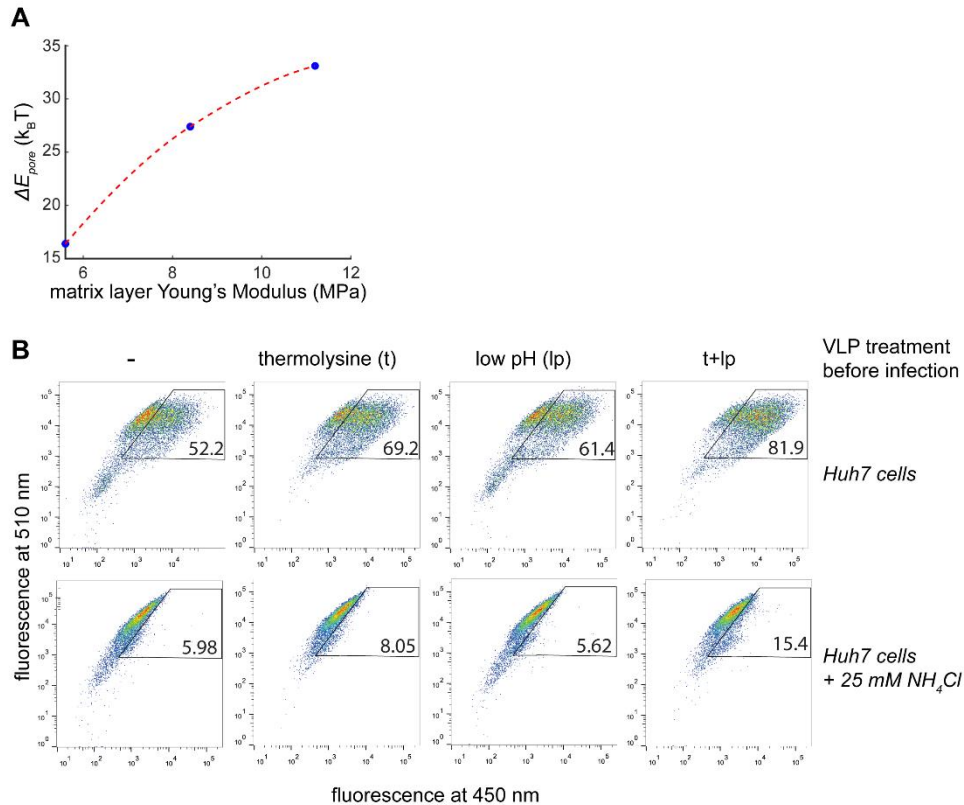

1125

1126 **Fig. S8**

1127 **Entry of Ebola BlaM-VLPs into Huh7 cells. (A)** Plot showing the dependence of the change in  
1128 fusion pore formation energy between  $u_0=38 k_B T/\text{nm}^2$  to  $u_0=0$  ( $\Delta E_{\text{pore}}$ ) on the matrix  
1129 layer Young's modulus. Dotted lines serve as a guide to the eye. **(B)** FACS plots showing virus  
1130 entry as measured by a fluorescence shift of infected cells from emission at 510 nm (no entry) to  
1131 450 nm (entry). The top row indicates in vitro VLP treatments prior to infection including buffer  
1132 control (-), thermolysine treatment, low pH treatment, and a combination of thermolysine and low  
1133 pH. The first row of FACS data shows entry into Huh7 target cells, the second row shows entry  
1134 into Huh7 cells treated with 25 mM ammonium chloride to neutralize acidic compartments and  
1135 assess virus entry in the absence of acidification. FACS data are shown from one out of three  
1136 repetitions, with 10000 cells measured per sample.
